# Supplementary material for: Heterobimetallic Pd(0) complexes with Pd→Ln (Ln = Sc, Y, Yb, Lu) dative bonds: rare-earth metal-dominated frustrated Lewis pair-like reactivity
Source: Royal Society of Chemistry journal article supplement (doi:10.1039/d0dt02708a), 2020-01-01
Supplement: d0dt02708a1.pdf [file d0dt02708a1.pdf]

## Supporting Information:

### Heterobimetallic Pd(0) Complexes with Pd→Ln (Ln = Sc, Y, Yb, Lu) Dative Bonds: Rare-earth Metal Dominated Frustrated Lewis pair-like Reactivity

Jun Du,<sup>†</sup> Yanan Zhang,<sup>†</sup> Zeming Huang,<sup>†</sup> Shuangliu Zhou\*,<sup>†</sup>

Huayi Fang\*,<sup>‡</sup> Peng Cui\*<sup>†</sup>

<sup>†</sup> Key Laboratory of Functional Molecular Solids, Ministry of Education; Anhui Laboratory of Molecule-Based Materials; College of Chemistry and Materials Science  
Anhui Normal University  
S 189, Jiuhua Road, Wuhu, Anhui 241002 (P. R. China)  
E-mail: pcui@ahnu.edu.cn; slzhou@ahnu.edu.cn

<sup>‡</sup> School of Materials Science and Engineering  
Nankai University  
No. 38 Tongyan Road, Haihe Education Park, Tianjin 300350 (P. R. China)  
E-mail: hfang@nankai.edu.cn

## Table of Contents:

|                                |    |
|--------------------------------|----|
| 1. Spectroscopic Data .....    | 2  |
| 2. X-ray Crystallography ..... | 22 |
| 3. Cyclic voltammograms.....   | 28 |
| 4. Computational Details ..... | 32 |
| 5. References .....            | 37 |

# 1. Spectroscopic Data

## NMR spectra

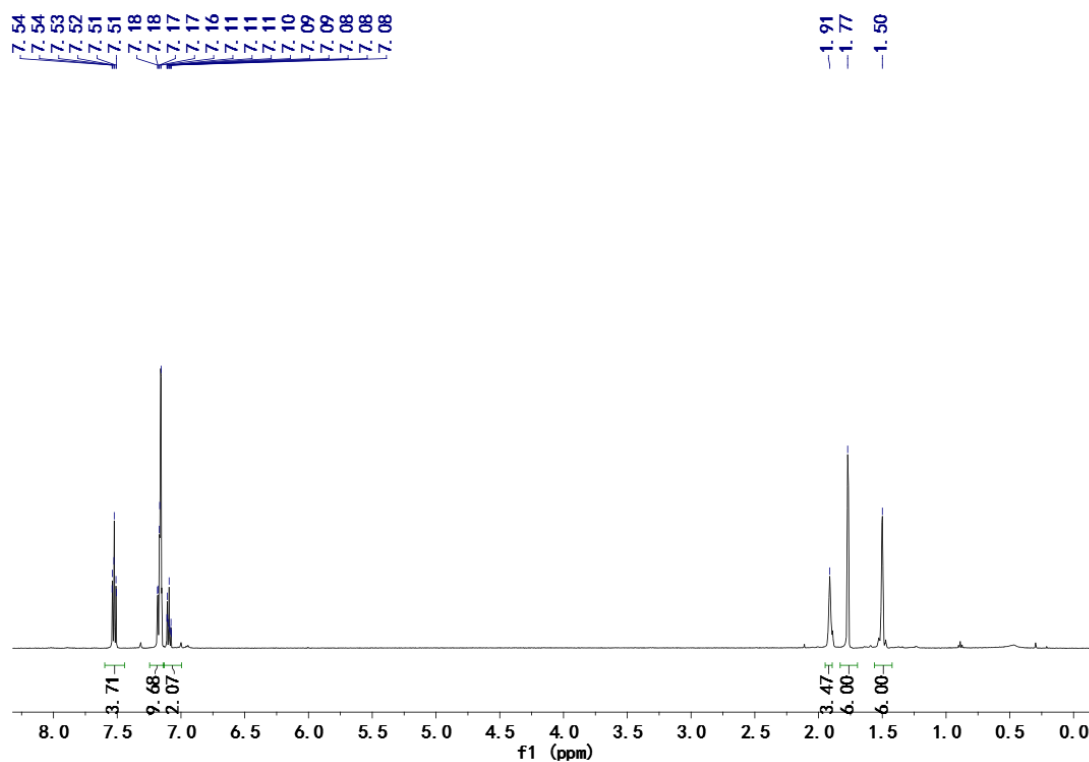

Figure S1.  $^1\text{H}$  NMR spectrum of **LH** in  $\text{C}_6\text{D}_6$  at 25 °C.

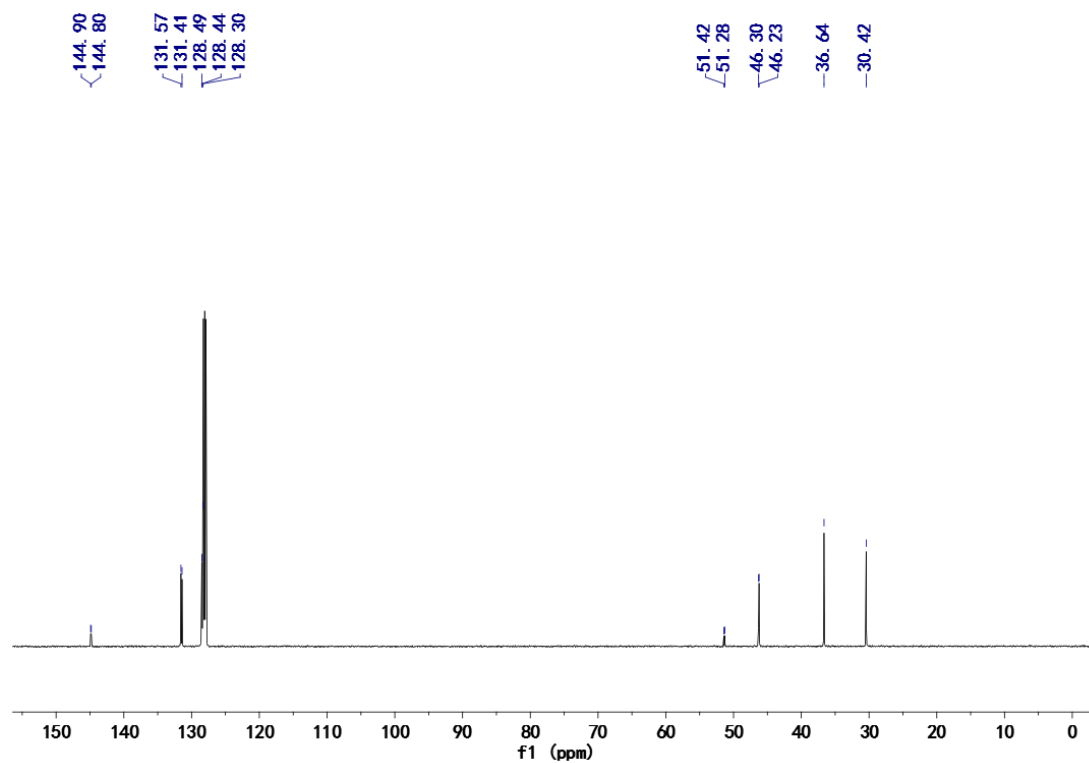

Figure S2.  $^{13}\text{C}\{^1\text{H}\}$  NMR spectrum of **LH** in  $\text{C}_6\text{D}_6$  at 25 °C.

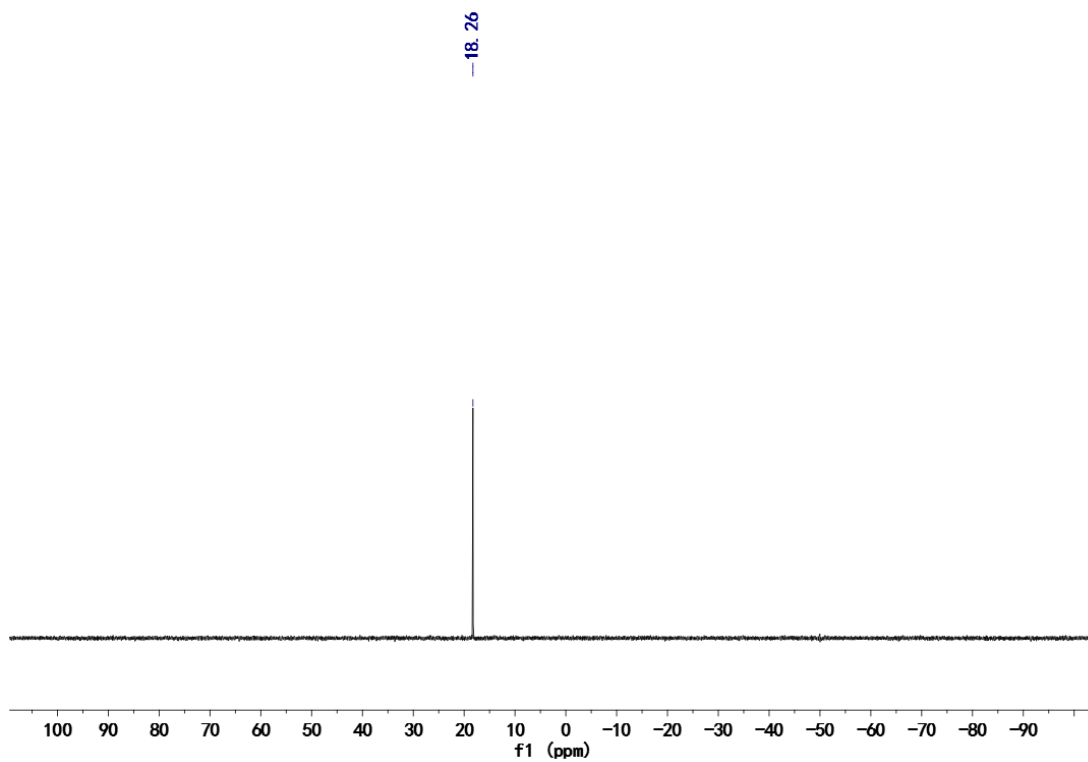

Figure S3.  $^{31}\text{P}\{^1\text{H}\}$  NMR spectrum of LH in  $\text{C}_6\text{D}_6$  at 25 °C.

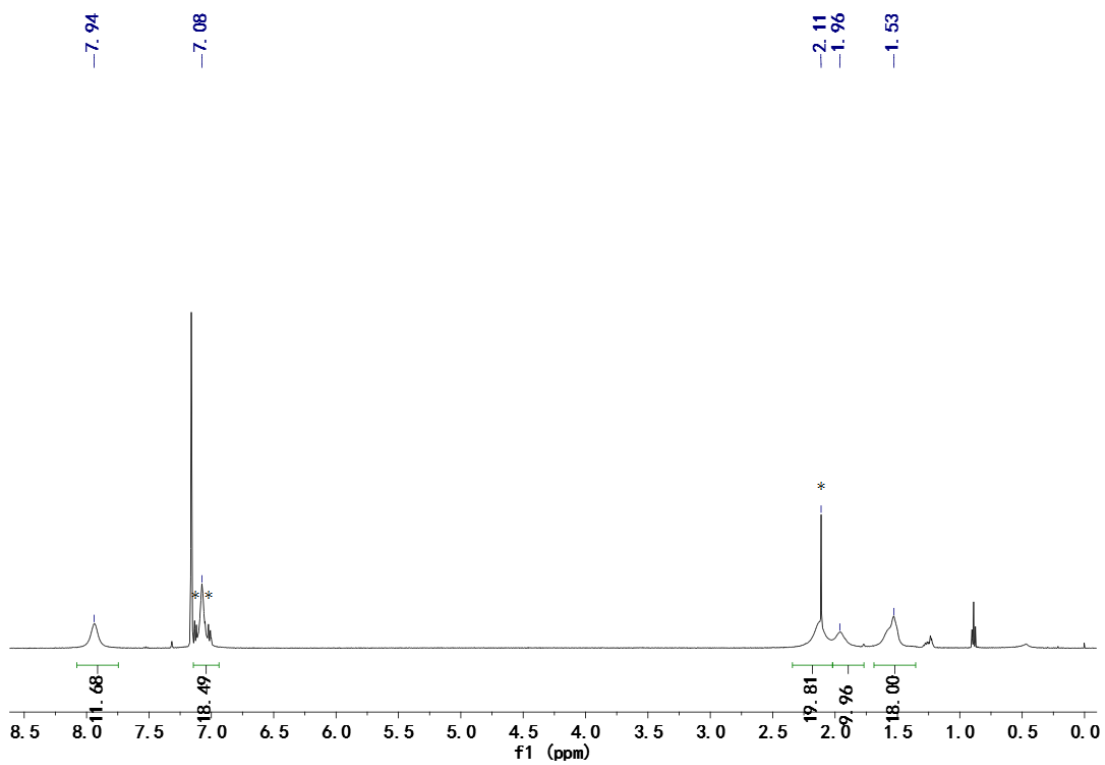

Figure S4.  $^1\text{H}$  NMR spectrum of **1** in  $\text{C}_6\text{D}_6$  at 25 °C. (\* denotes small amount of toluene)

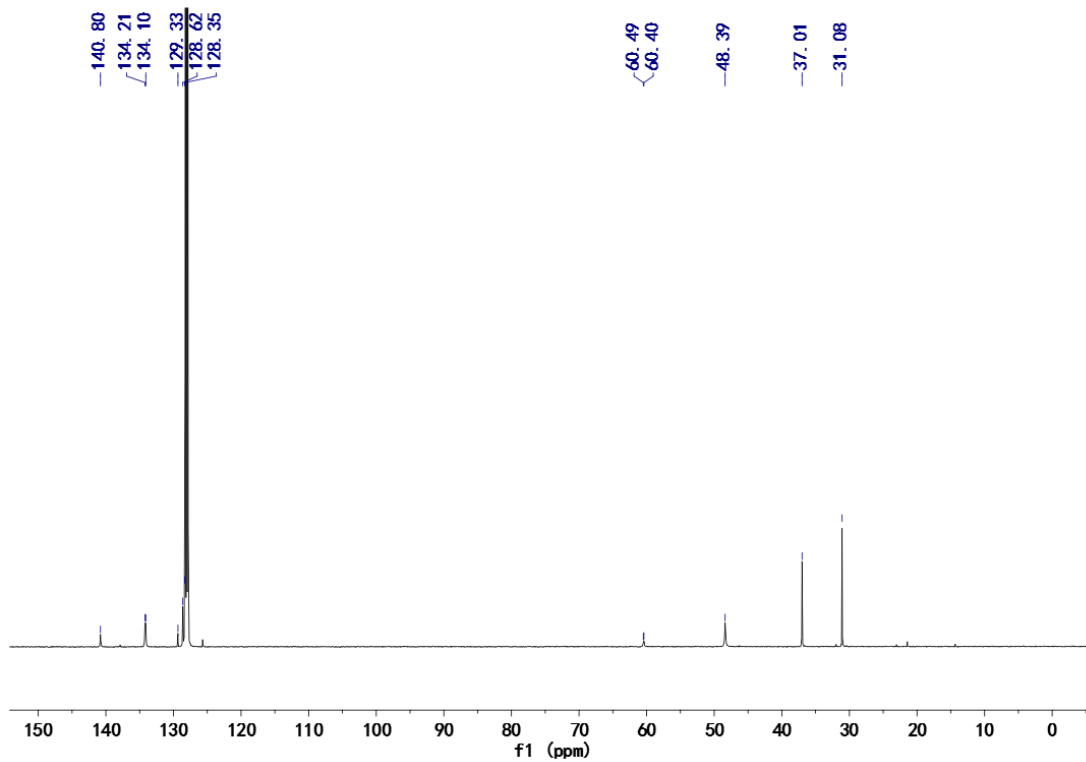

Figure S5.  $^{13}\text{C}\{^1\text{H}\}$  NMR spectrum of **1** in  $\text{C}_6\text{D}_6$  at 25 °C.

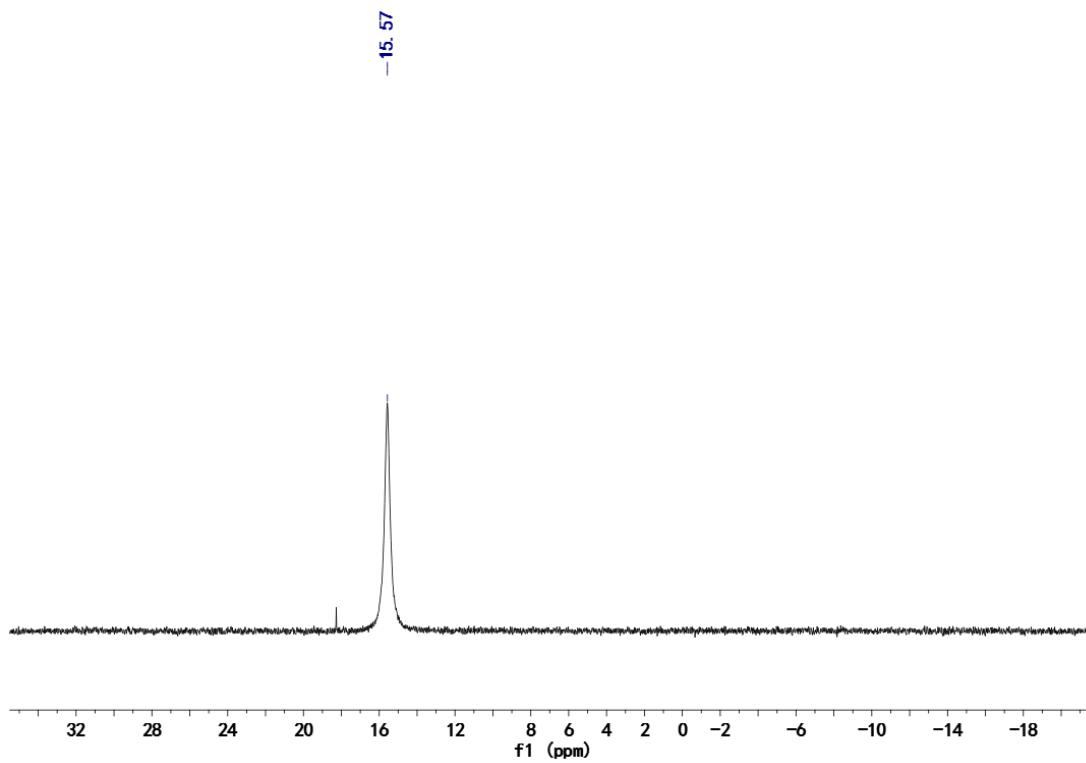

Figure S6.  $^{31}\text{P}\{^1\text{H}\}$  NMR spectrum of **1** in  $\text{C}_6\text{D}_6$  at 25 °C.

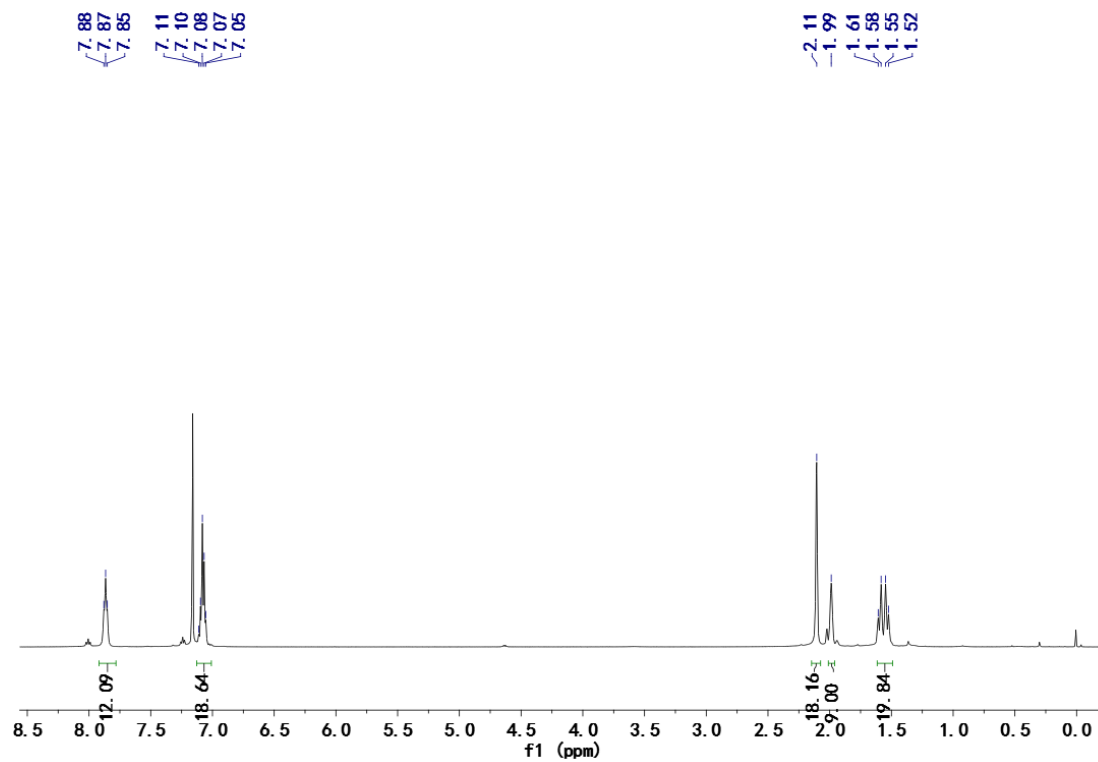

Figure S7.  $^1\text{H}$  NMR spectrum of **2** in  $\text{C}_6\text{D}_6$  at 25 °C.

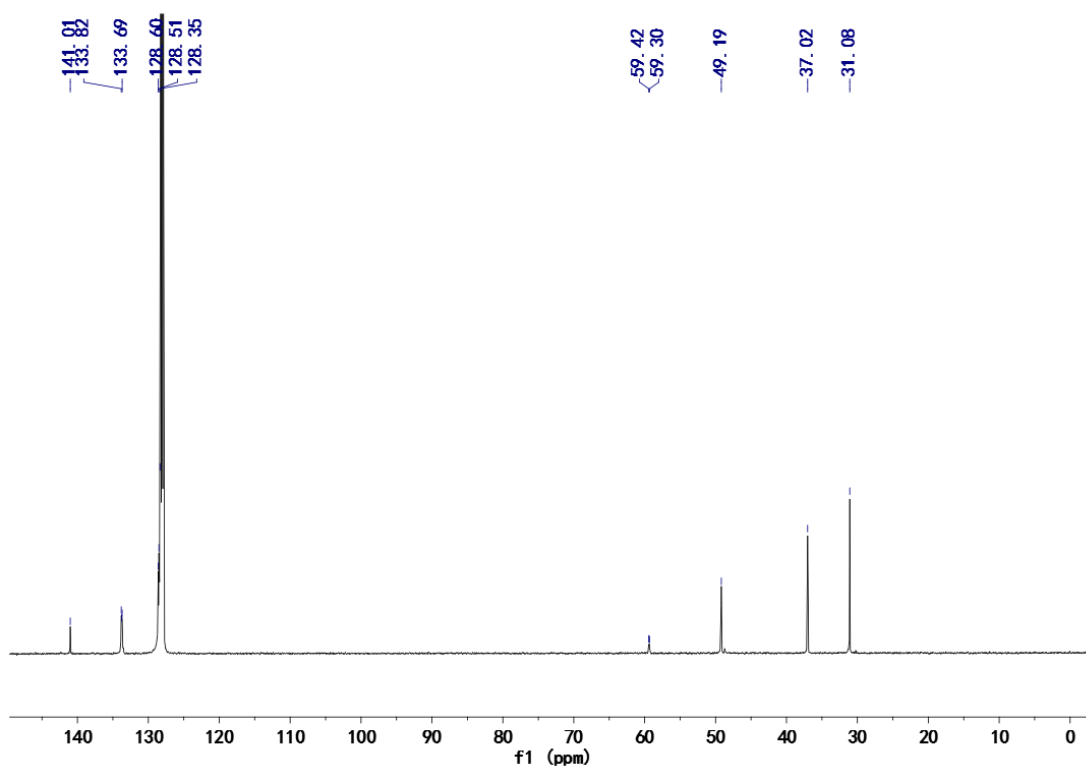

Figure S8.  $^{13}\text{C}\{^1\text{H}\}$  NMR spectrum of **2** in  $\text{C}_6\text{D}_6$  at 25 °C.

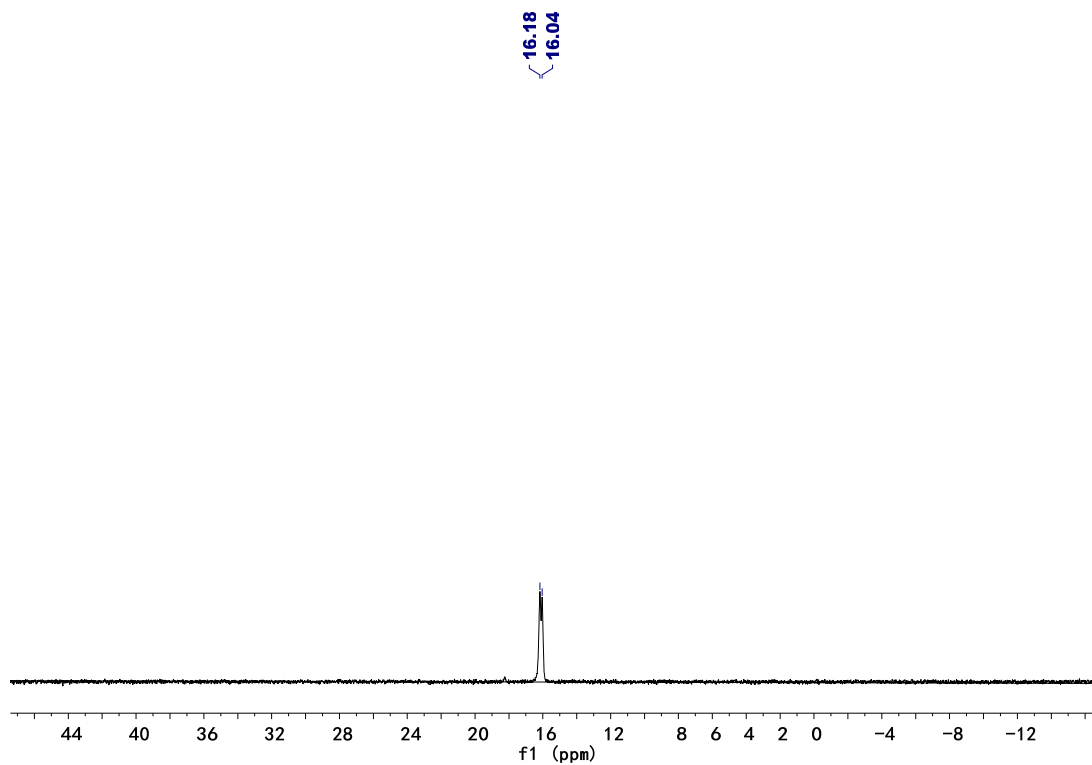

Figure S9. <sup>31</sup>P{<sup>1</sup>H} NMR spectrum of **2** in C<sub>6</sub>D<sub>6</sub> at 25 °C.

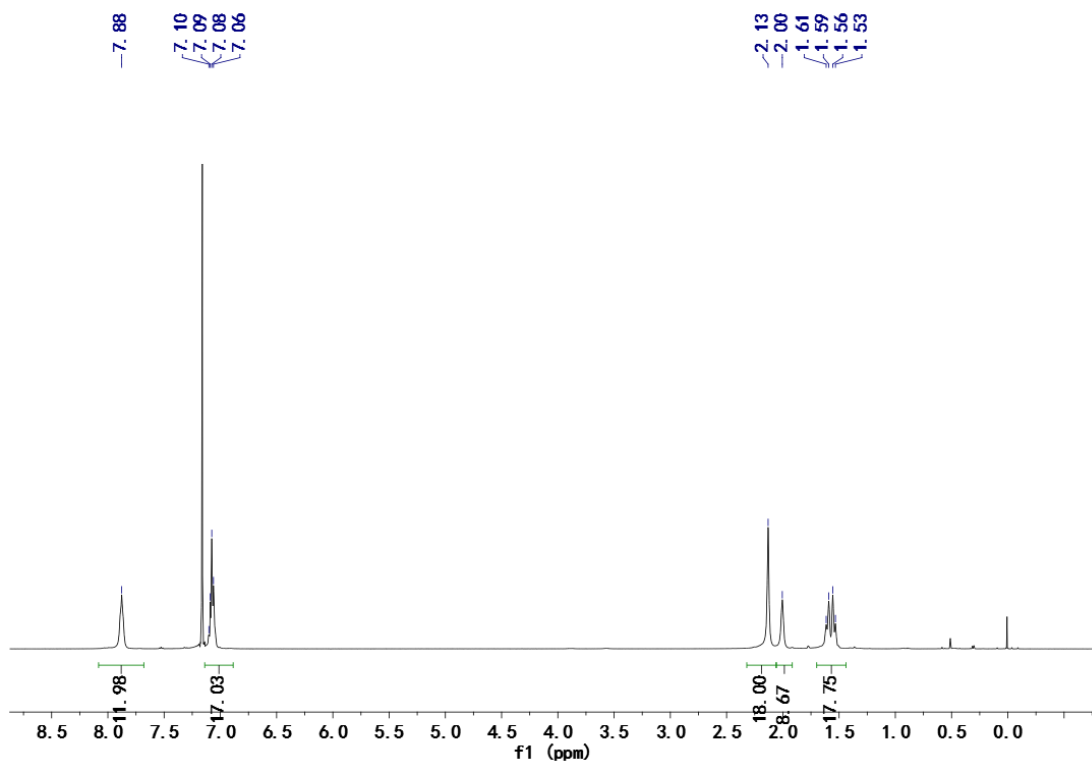

Figure S10. <sup>1</sup>H NMR spectrum of **4** in C<sub>6</sub>D<sub>6</sub> at 25 °C.

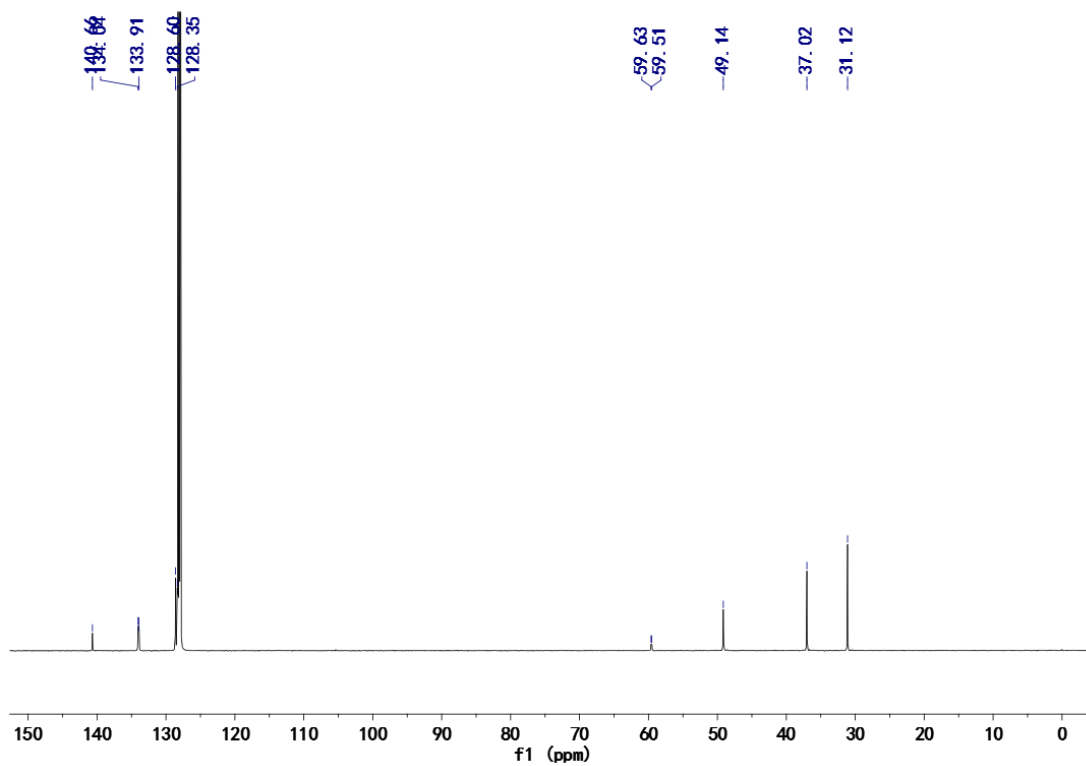

Figure S11.  $^{13}\text{C}\{^1\text{H}\}$  NMR spectrum of **4** in  $\text{C}_6\text{D}_6$  at 25 °C.

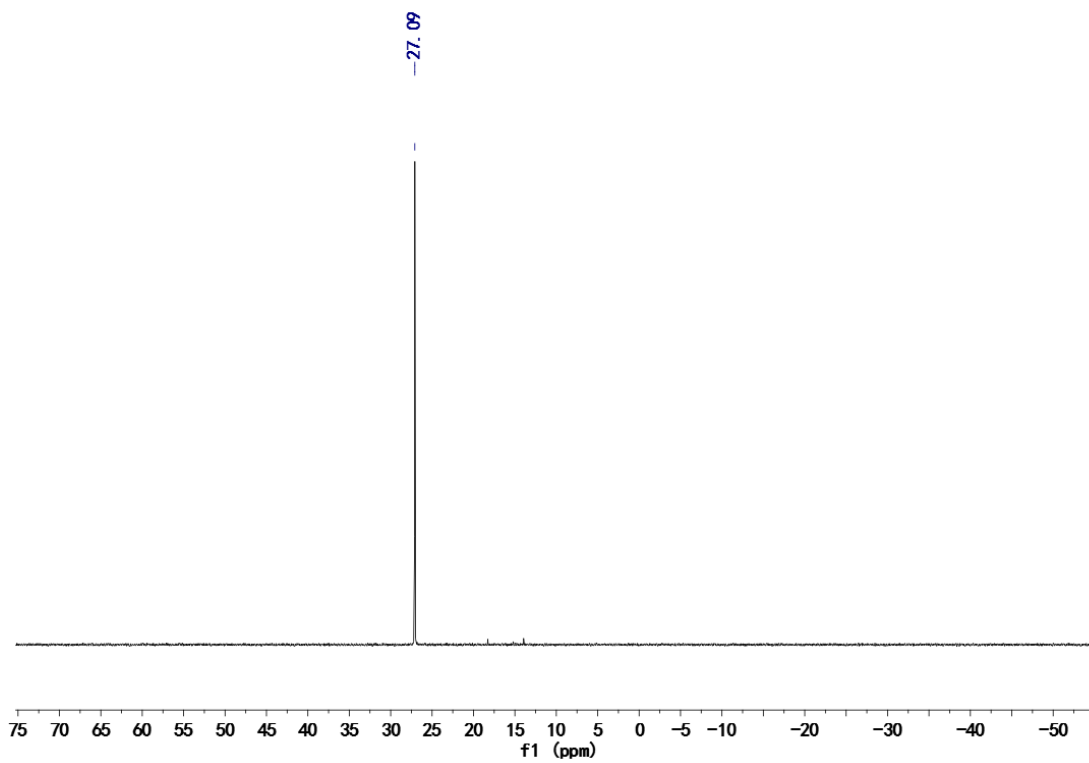

Figure S12.  $^{31}\text{P}\{^1\text{H}\}$  NMR spectrum of **4** in  $\text{C}_6\text{D}_6$  at 25 °C.

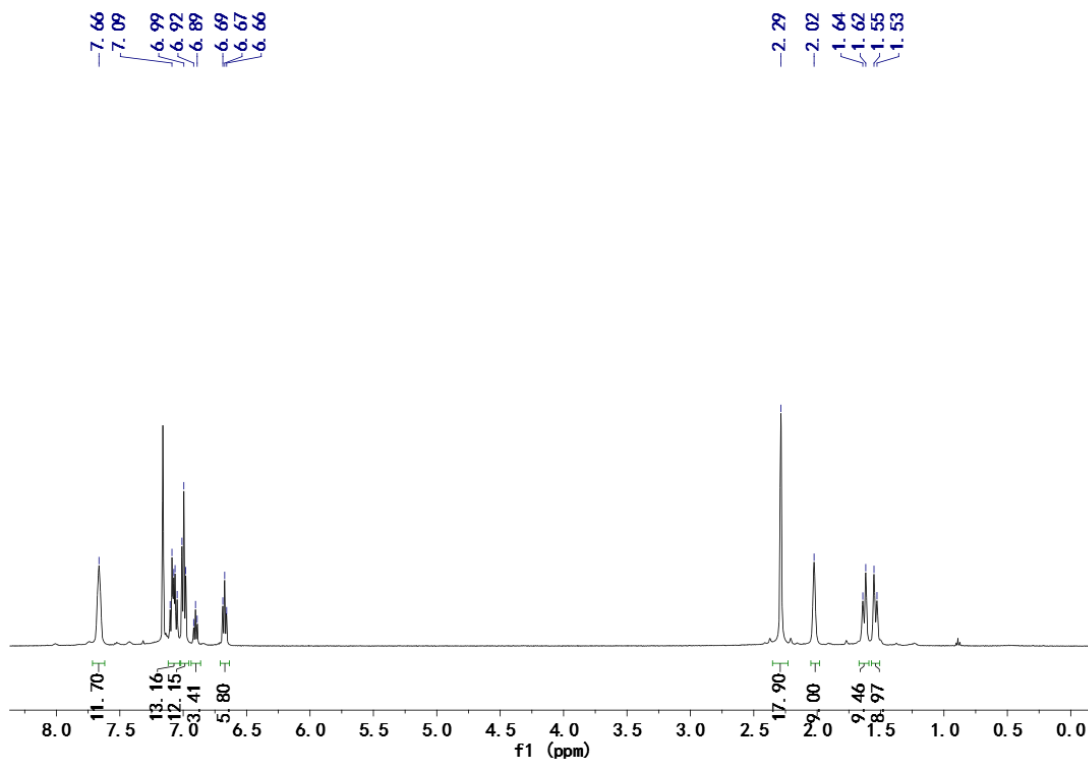

Figure S13.  $^1\text{H}$  NMR spectrum of **5** in  $\text{C}_6\text{D}_6$  at 25 °C.

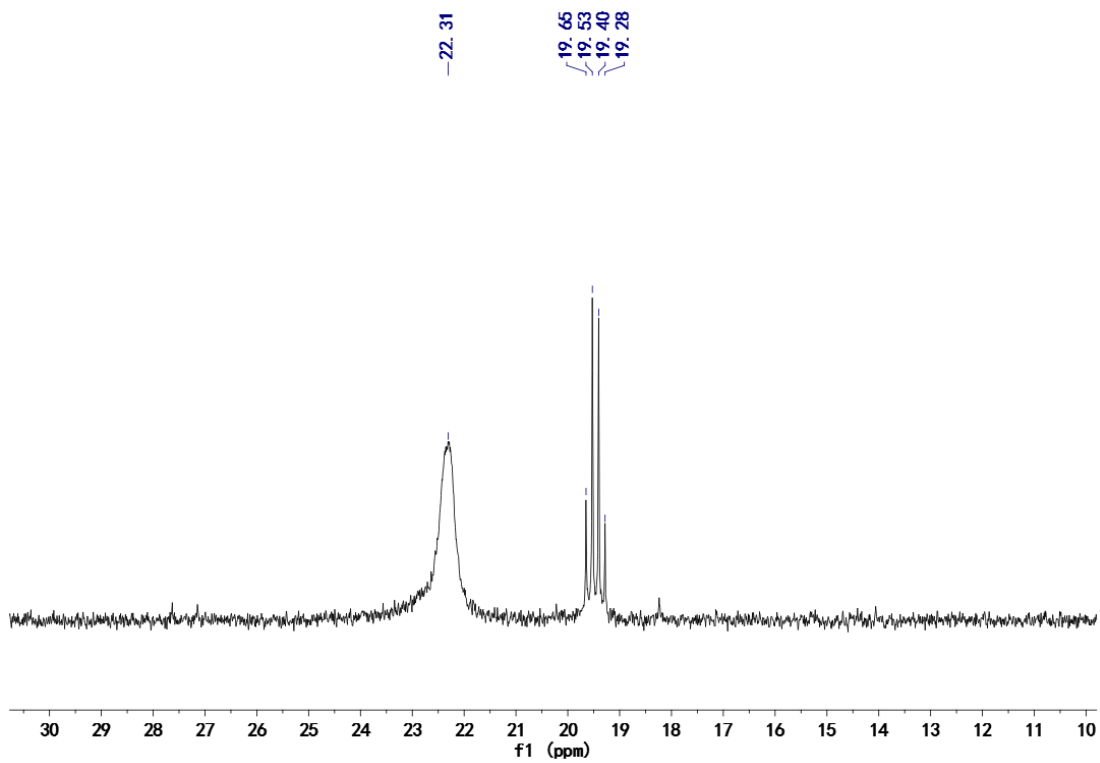

Figure S14.  $^{31}\text{P}\{^1\text{H}\}$  NMR spectrum of **5** in  $\text{C}_6\text{D}_6$  at 25 °C.



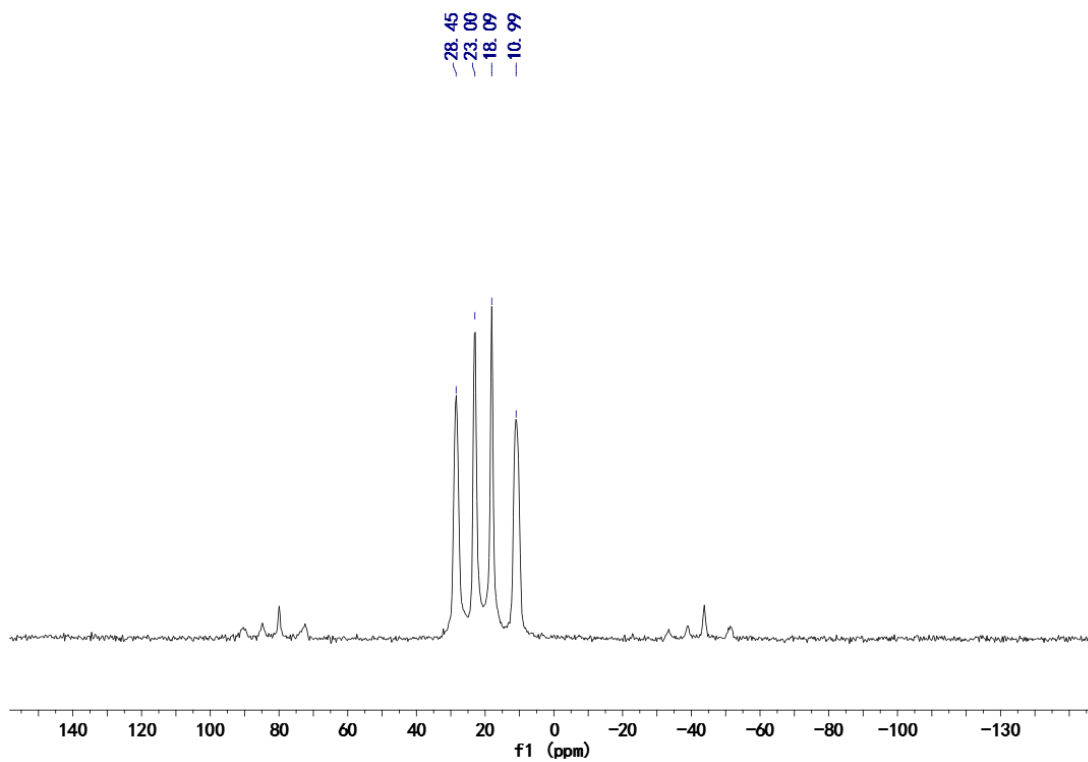

**Figure S15.**  $^{31}\text{P}\{^1\text{H}\}$  NMR (CP-MAS, 15kHz) spectrum of **5** at 25 °C.

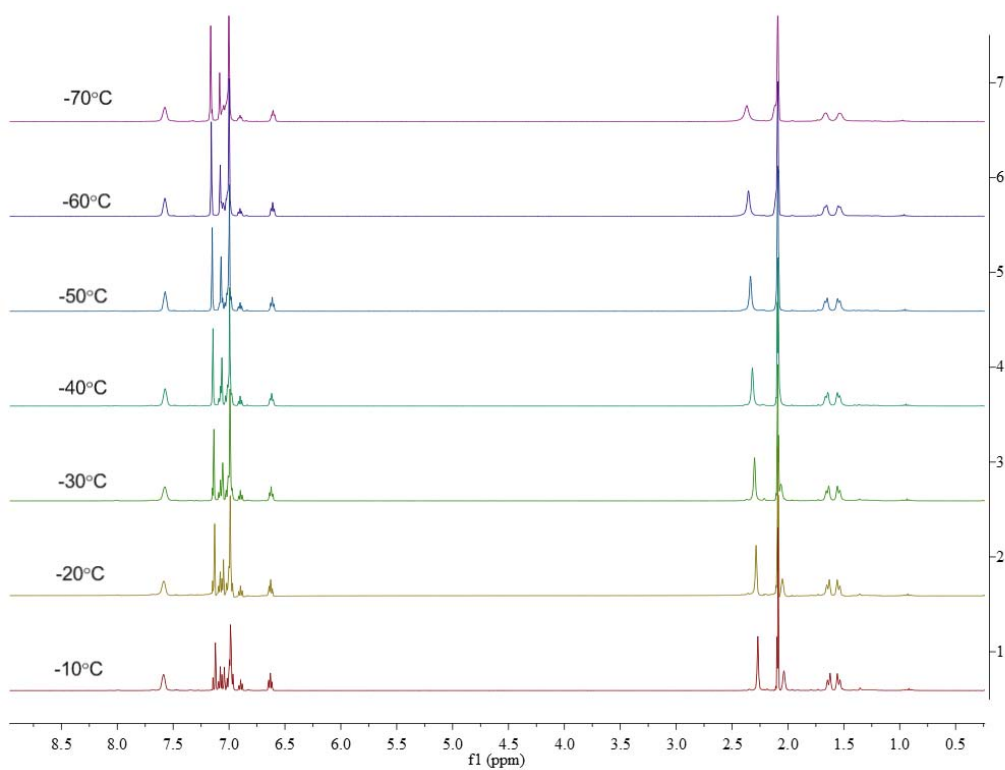

**Figure S16.** VT- $^1\text{H}$  NMR spectra of **5** in toluene- $d_8$  at various temperature.

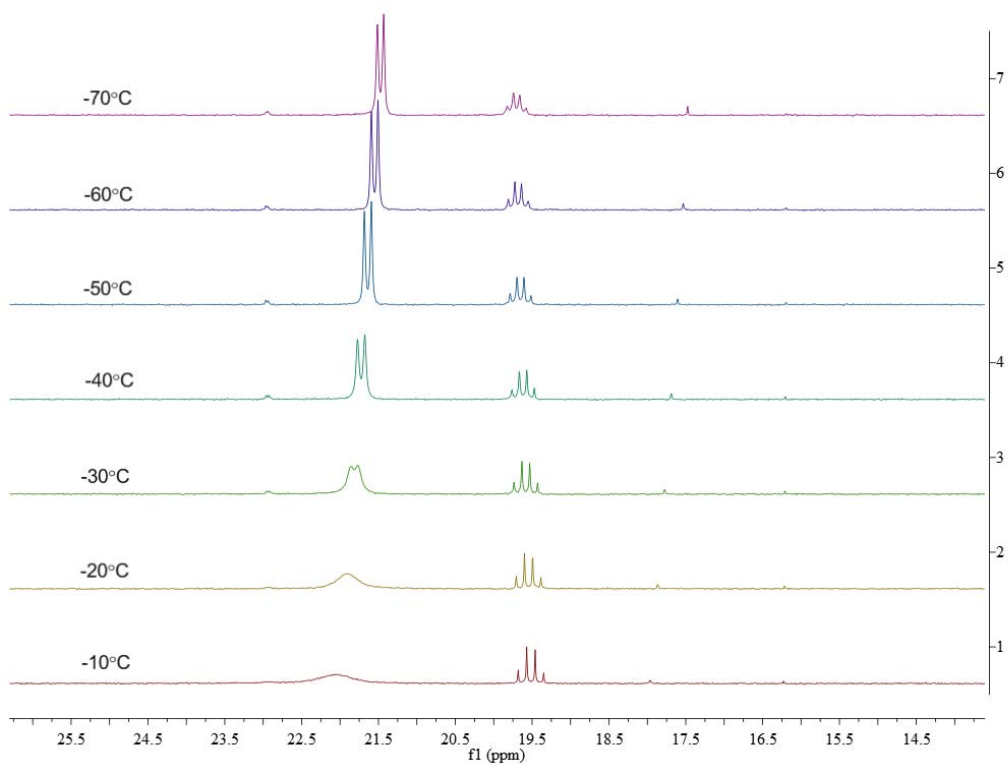

Figure S17. VT- $^{31}\text{P}\{^1\text{H}\}$  NMR spectrum of **5** in  $\text{toluene-}d_8$  at various temperature.

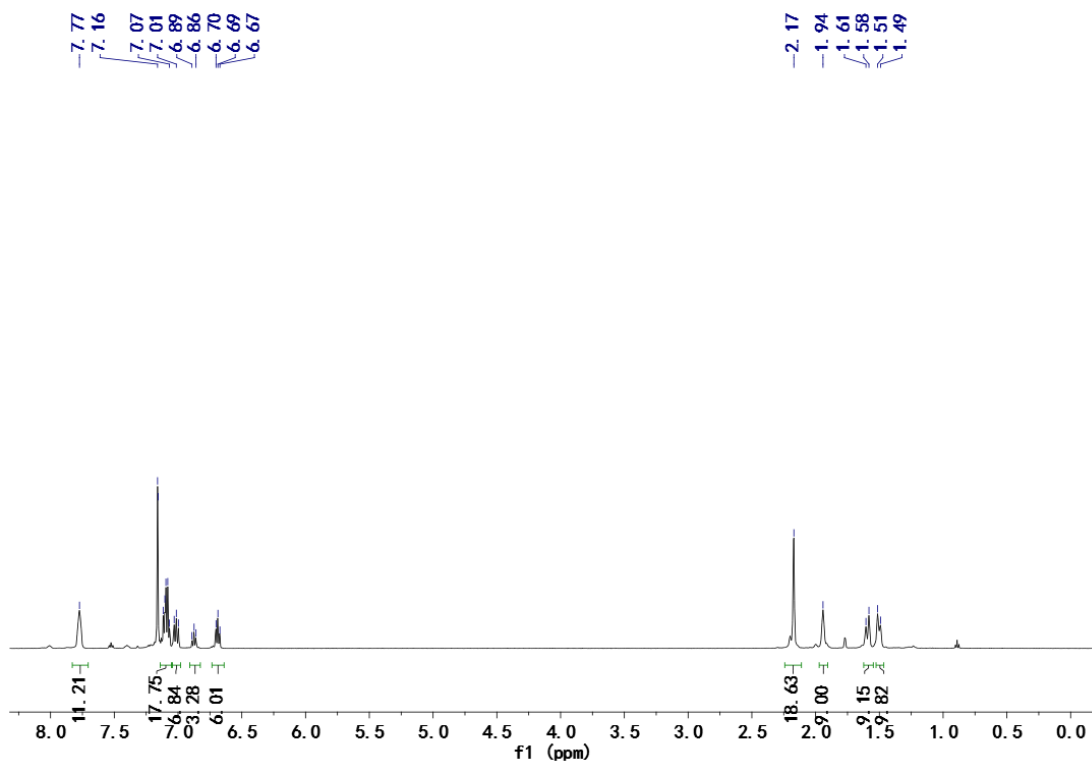

Figure S18.  $^1\text{H}$  NMR spectrum of **6** in  $\text{C}_6\text{D}_6$  at  $25^\circ\text{C}$ .

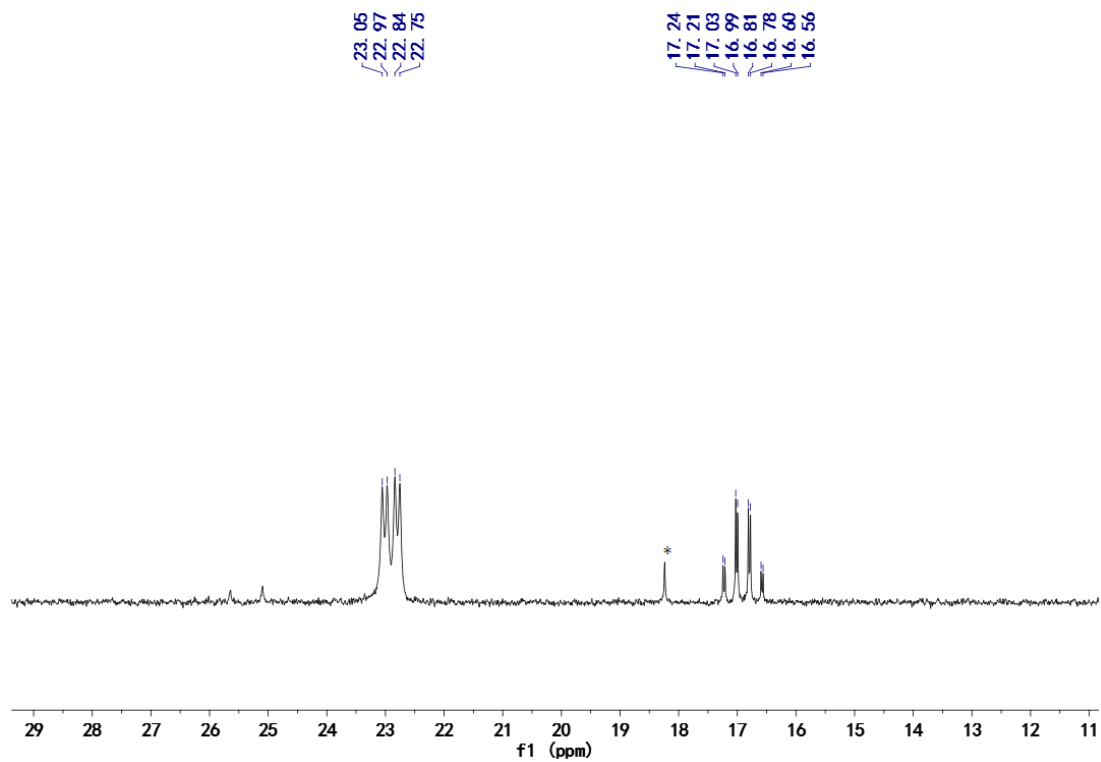

**Figure S19.**  $^{31}\text{P}\{^1\text{H}\}$  NMR spectrum of **6** in  $\text{C}_6\text{D}_6$  at 25 °C. (\* denotes small amount of free ligand)

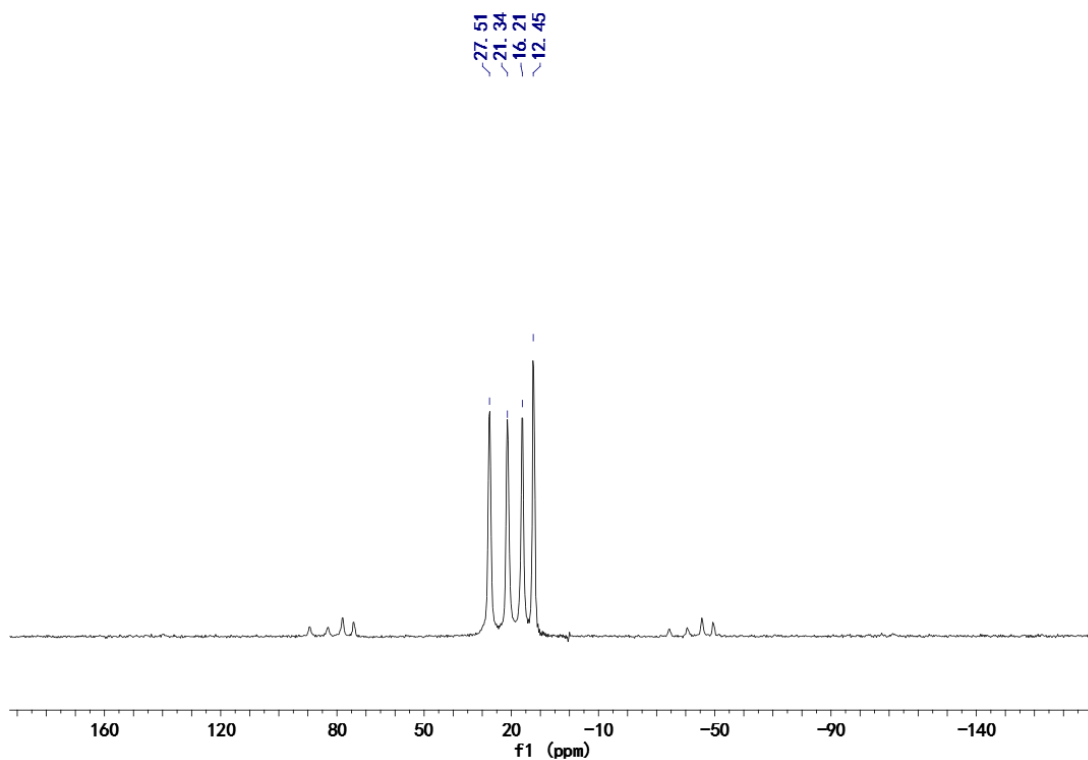

**Figure S20.**  $^{31}\text{P}\{^1\text{H}\}$  NMR (CP-MAS, 15kHz) spectrum of **6** at 25 °C.

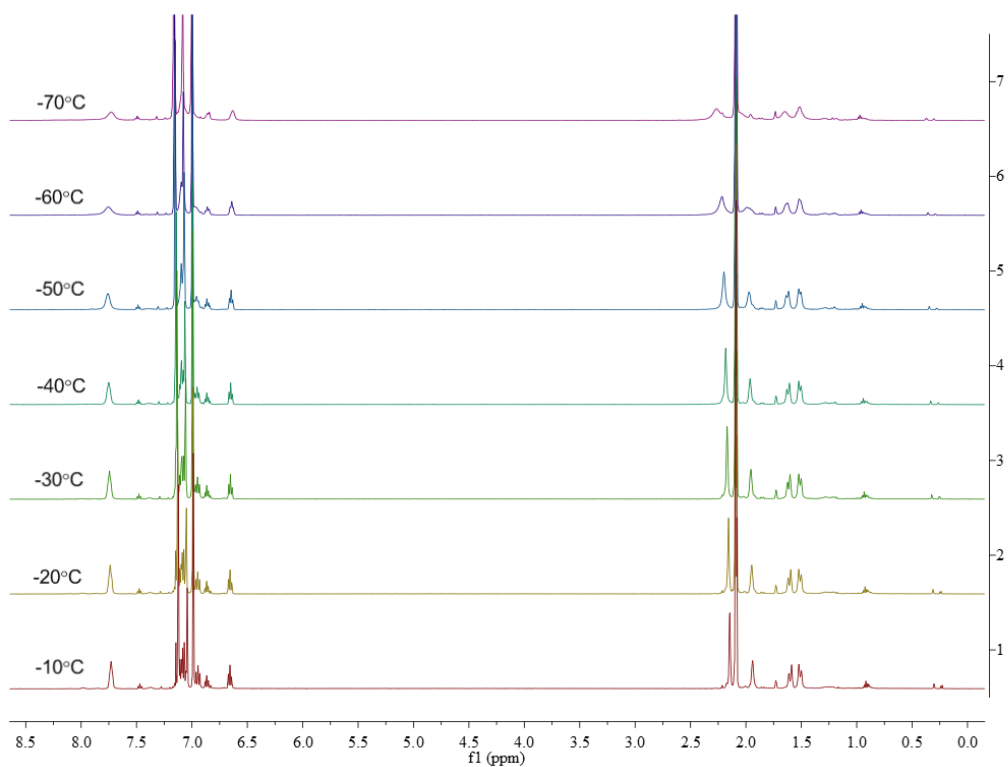

**Figure S21.** VT- $^1\text{H}$  NMR spectra of **6** in  $\text{toluene-}d_8$  at various temperature.

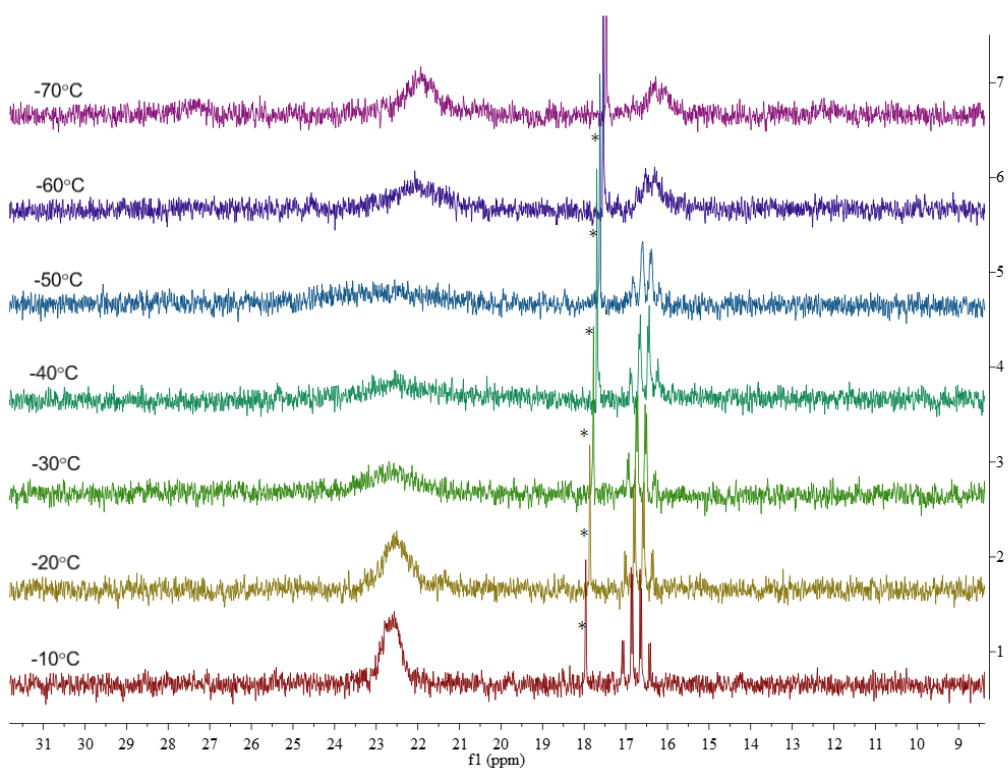

**Figure S22.** VT- $^{31}\text{P}\{^1\text{H}\}$  NMR spectra of **6** in  $\text{toluene-}d_8$  at various temperature. (\* denotes small amount of free ligand)

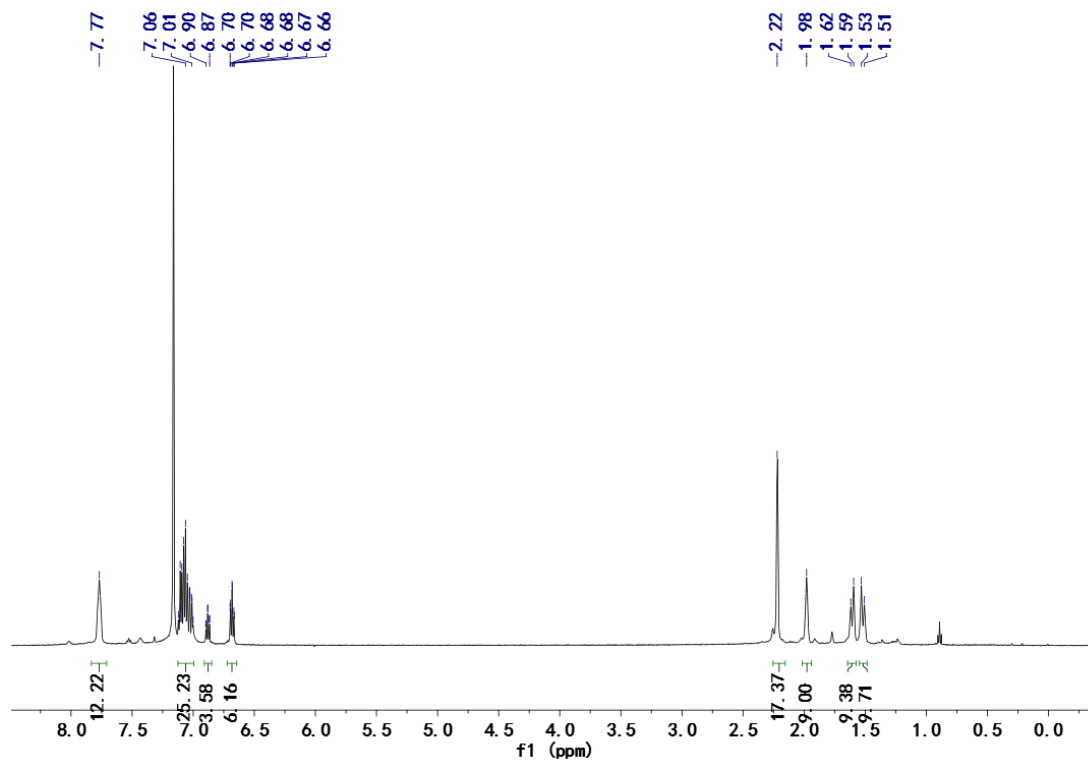

Figure S23.  $^1\text{H}$  NMR spectrum of **8** in  $\text{C}_6\text{D}_6$  at 25 °C.

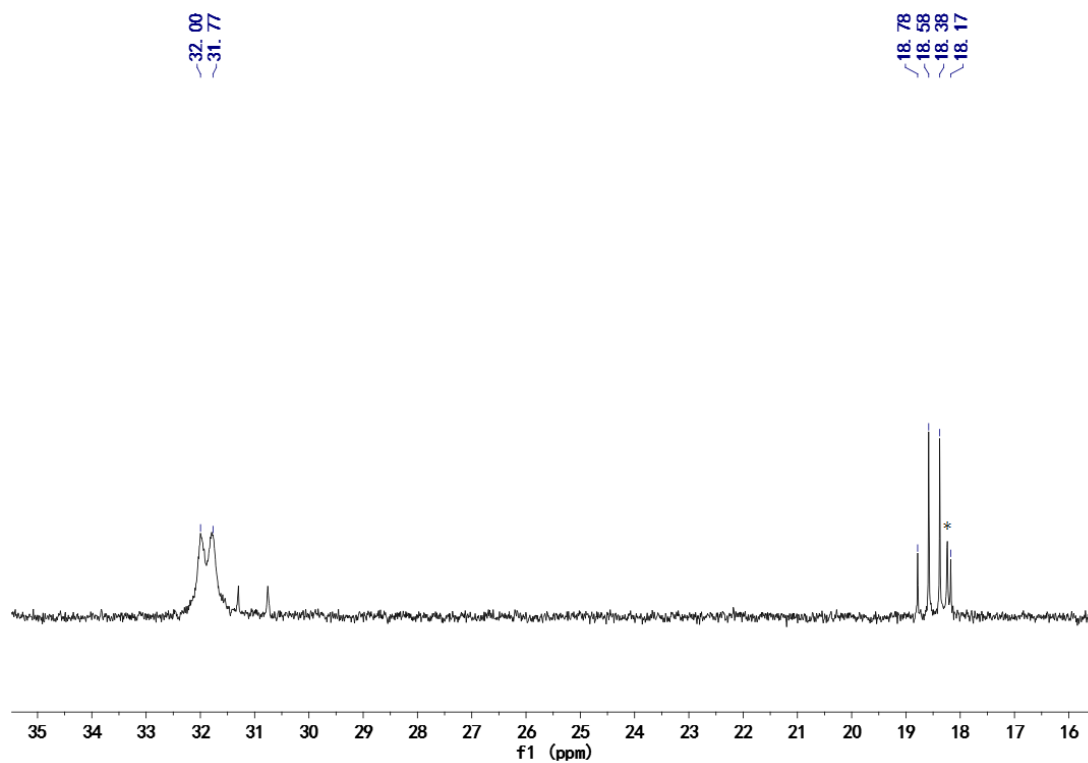

Figure S24.  $^{31}\text{P}\{^1\text{H}\}$  NMR spectrum of **8** in  $\text{C}_6\text{D}_6$  at 25 °C. (\* denotes small amount of free ligand)

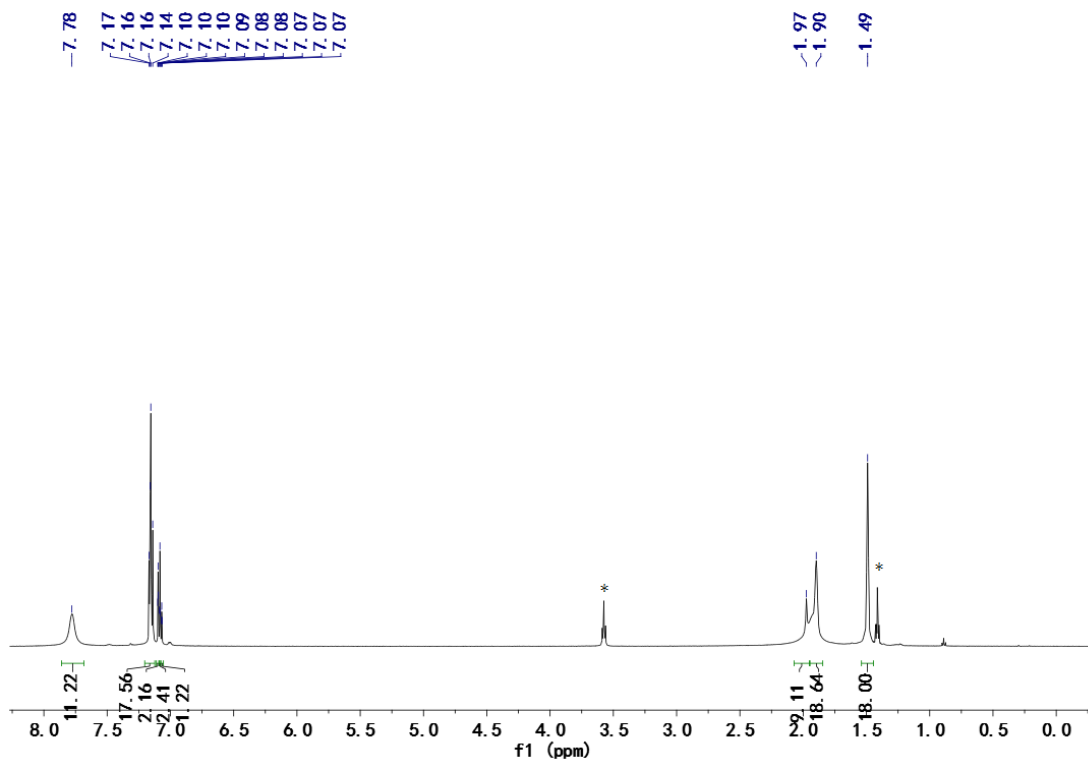

Figure S25.  $^1\text{H}$  NMR spectrum of **9** in  $\text{C}_6\text{D}_6$  at 25 °C. (\* denotes small amount of THF)

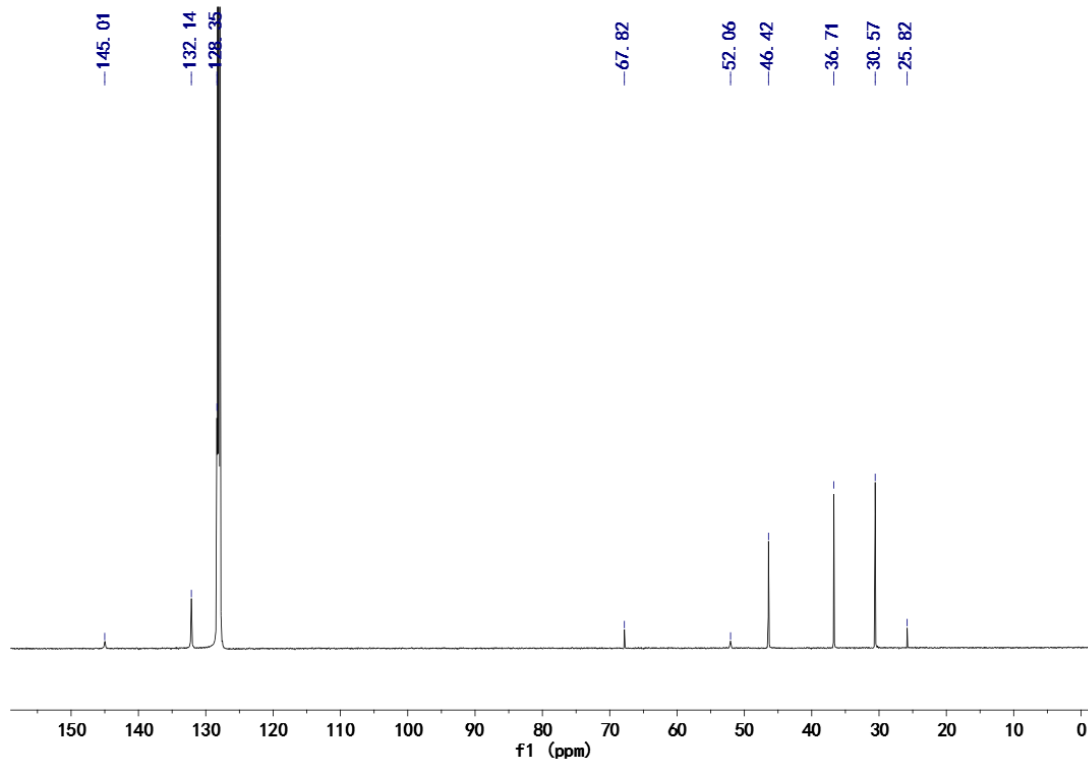

Figure S26.  $^{13}\text{C}\{^1\text{H}\}$  NMR spectrum of **9** in  $\text{C}_6\text{D}_6$  at 25 °C.

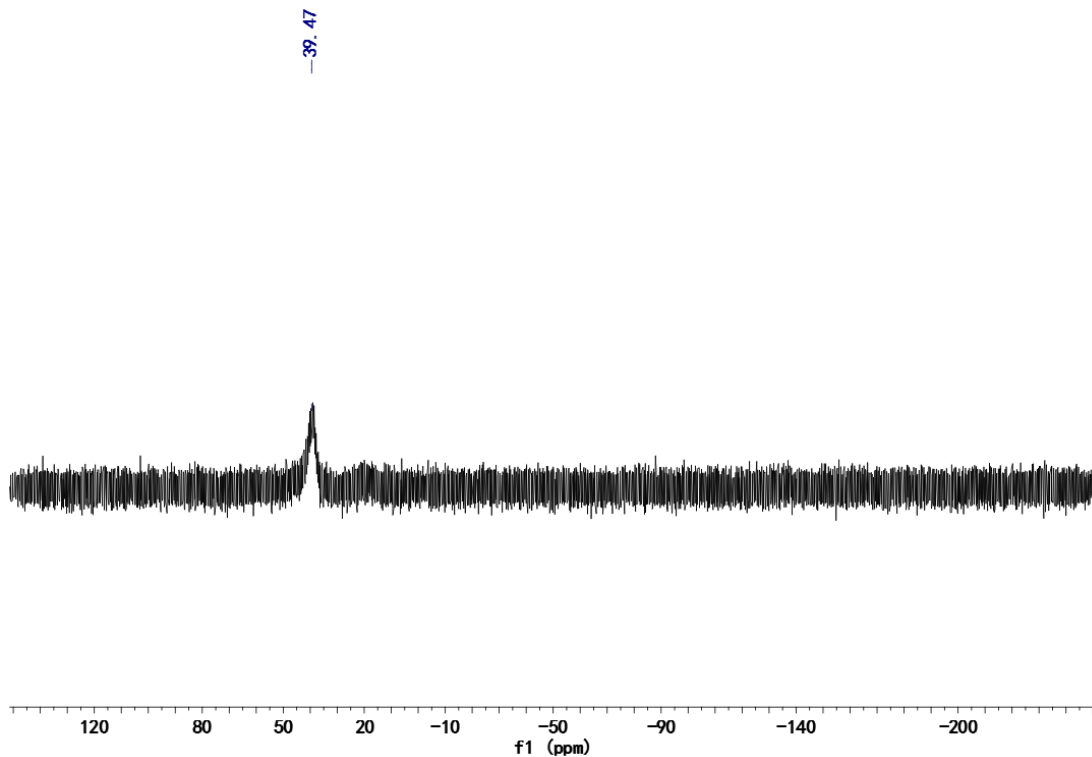

Figure S27.  $^{31}\text{P}\{^1\text{H}\}$  NMR spectrum of **9** in  $\text{C}_6\text{D}_6$  at 25 °C.

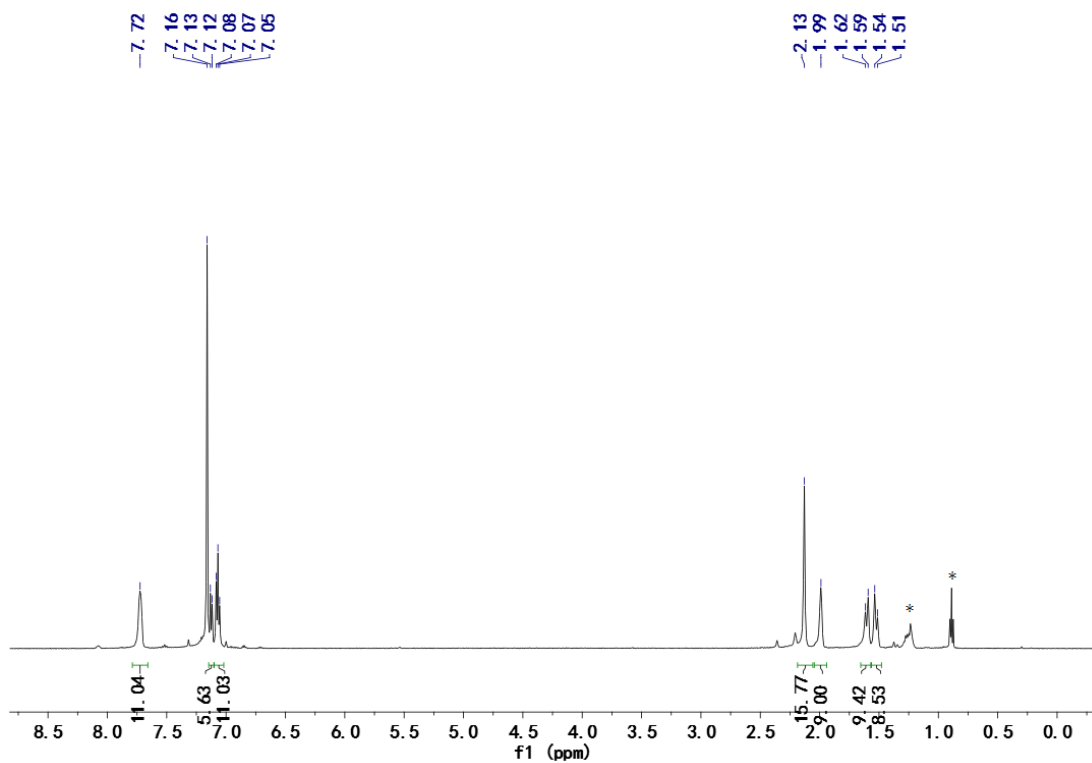

Figure S28.  $^1\text{H}$  NMR spectrum of **10** in  $\text{C}_6\text{D}_6$  at 25 °C. (\* denotes small amount of hexane)

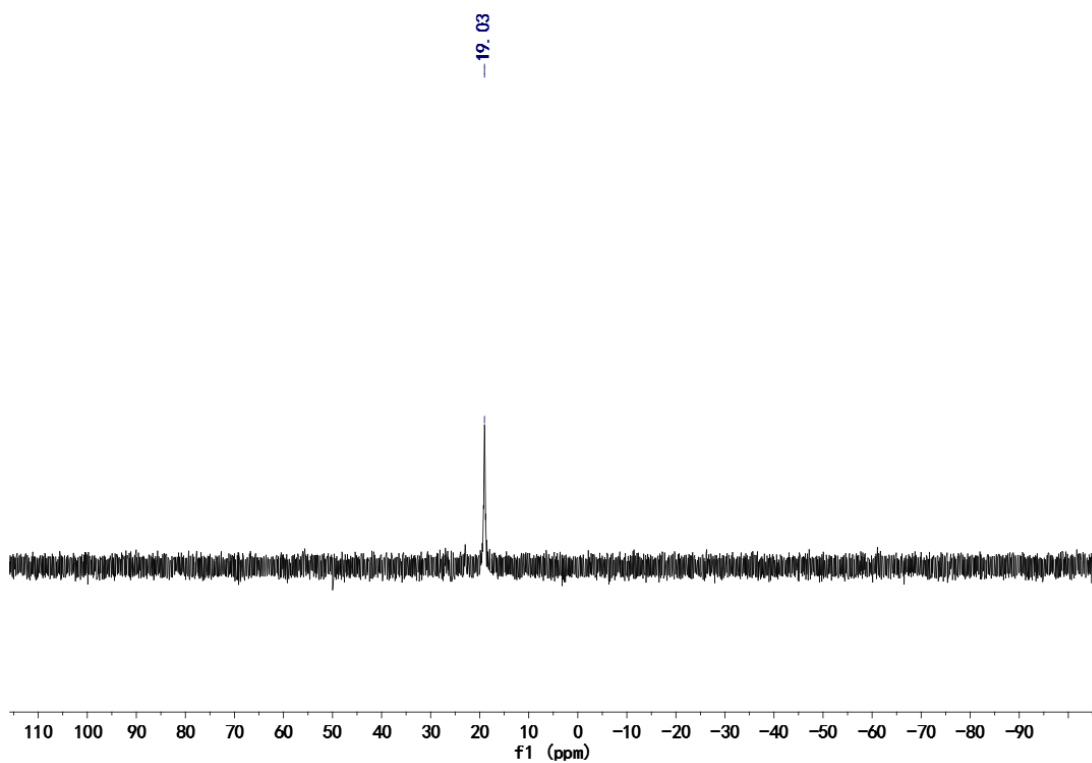

Figure S29.  $^{31}\text{P}\{^1\text{H}\}$  NMR spectrum of **10** in  $\text{C}_6\text{D}_6$  at  $25^\circ\text{C}$ .

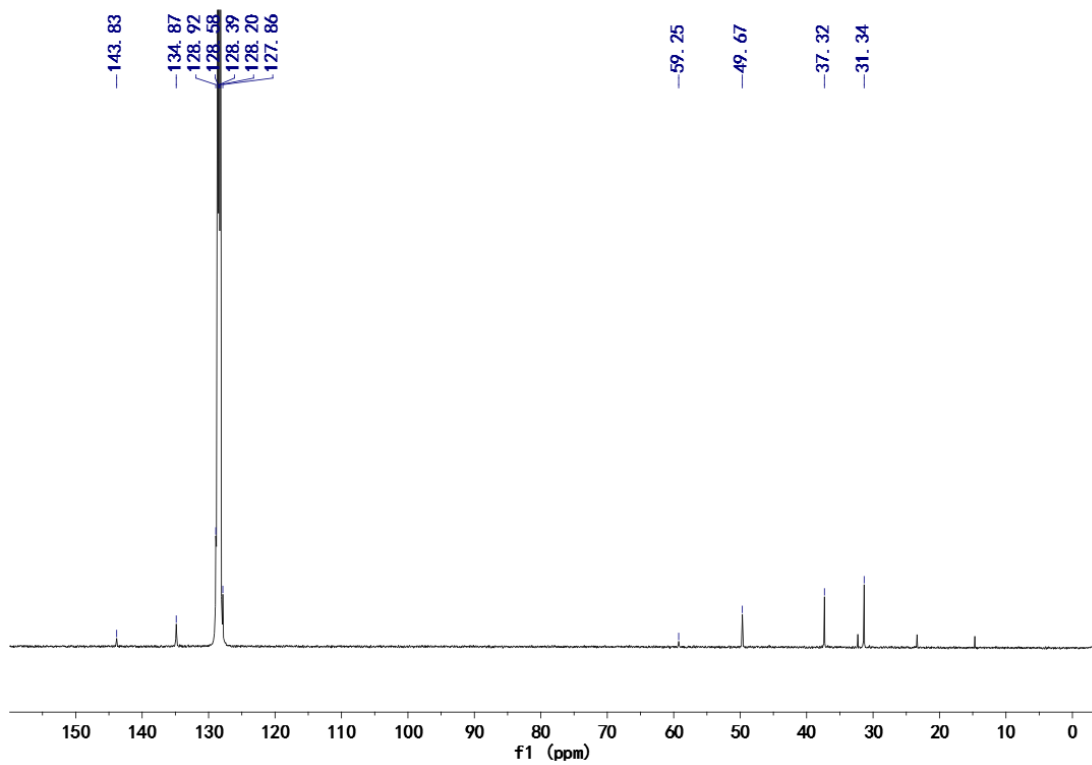

Figure S30.  $^{31}\text{P}\{^1\text{H}\}$  NMR spectrum of **10** in  $\text{C}_6\text{D}_6$  at  $25^\circ\text{C}$ .



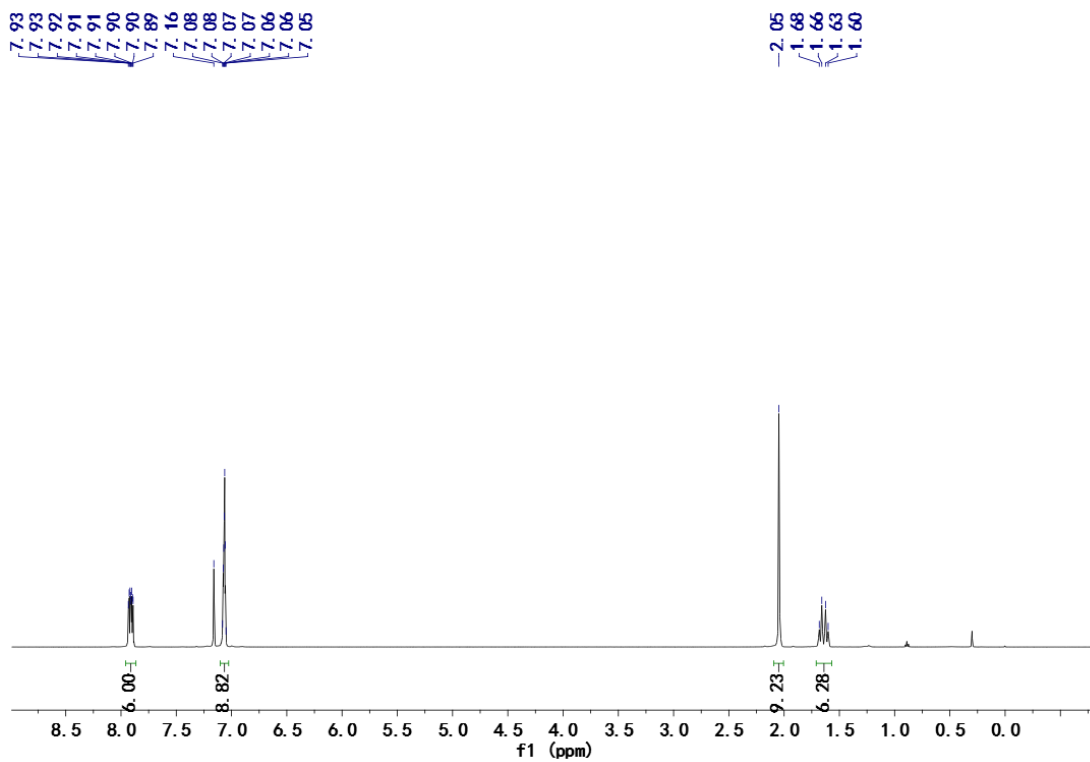

Figure S31.  $^1\text{H}$  NMR spectrum of **11** in  $\text{C}_6\text{D}_6$  at 25 °C.

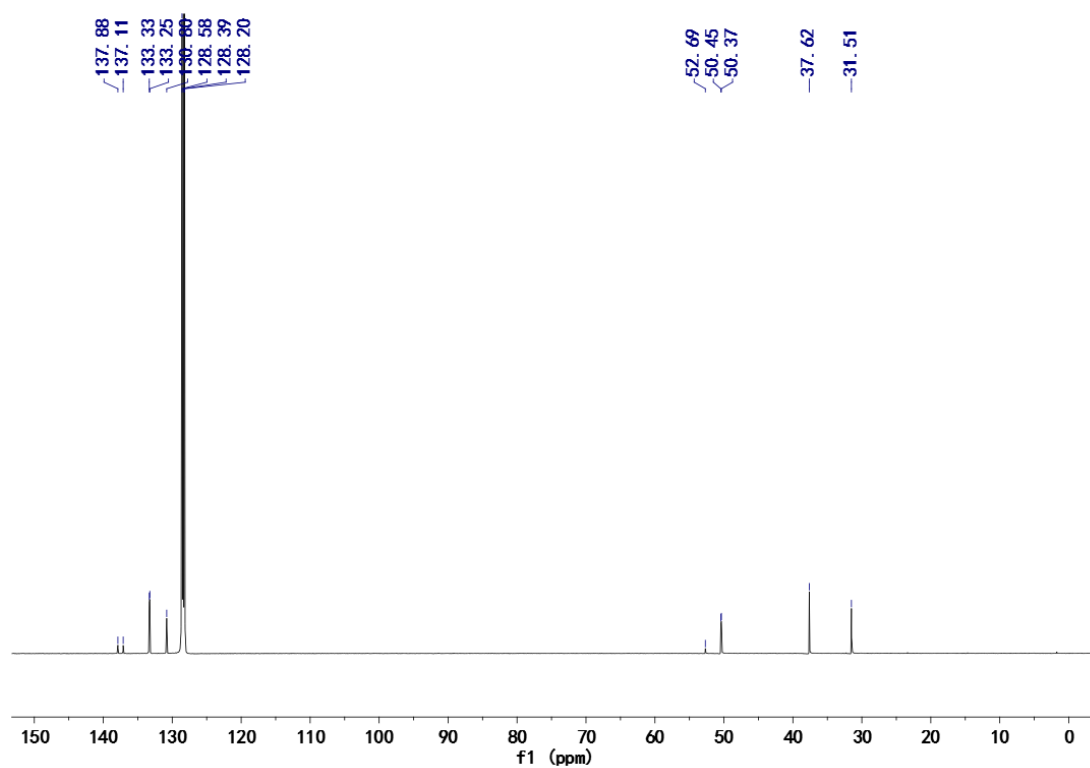

Figure S32.  $^{13}\text{C}\{^1\text{H}\}$  NMR spectrum of **11** in  $\text{C}_6\text{D}_6$  at 25 °C.

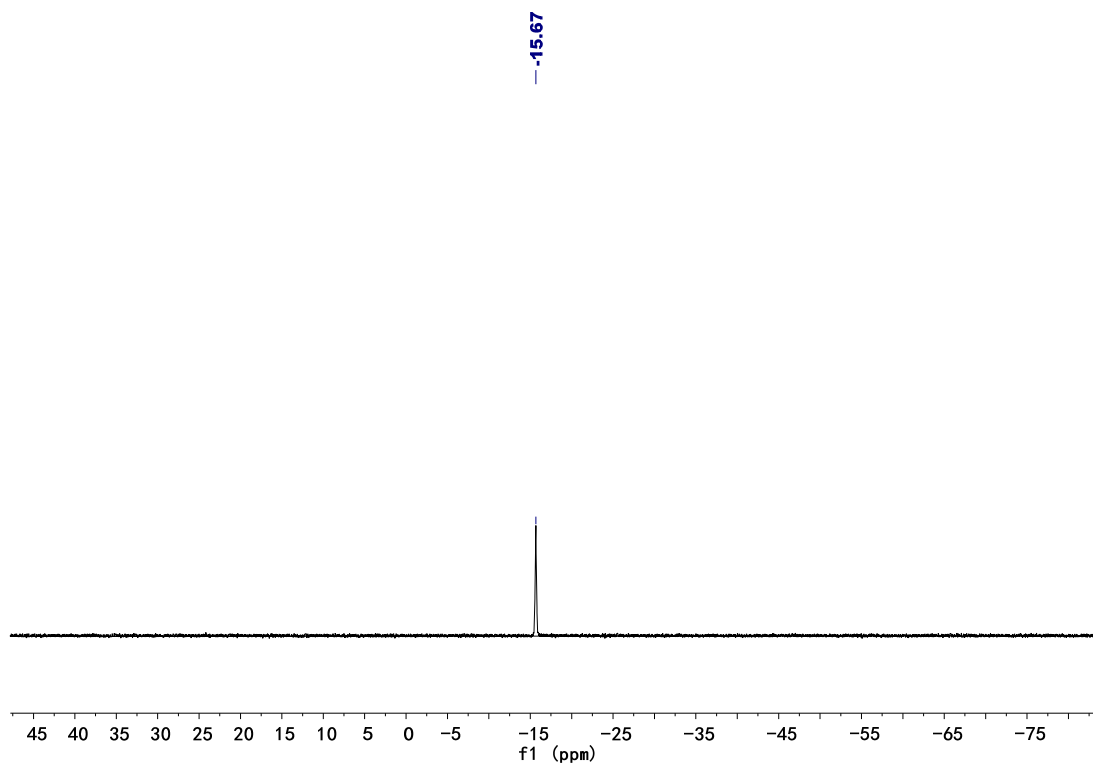

**Figure S33.**  $^{31}\text{P}\{^1\text{H}\}$  NMR spectrum of **11** in  $\text{C}_6\text{D}_6$  at  $25\text{ }^\circ\text{C}$ .

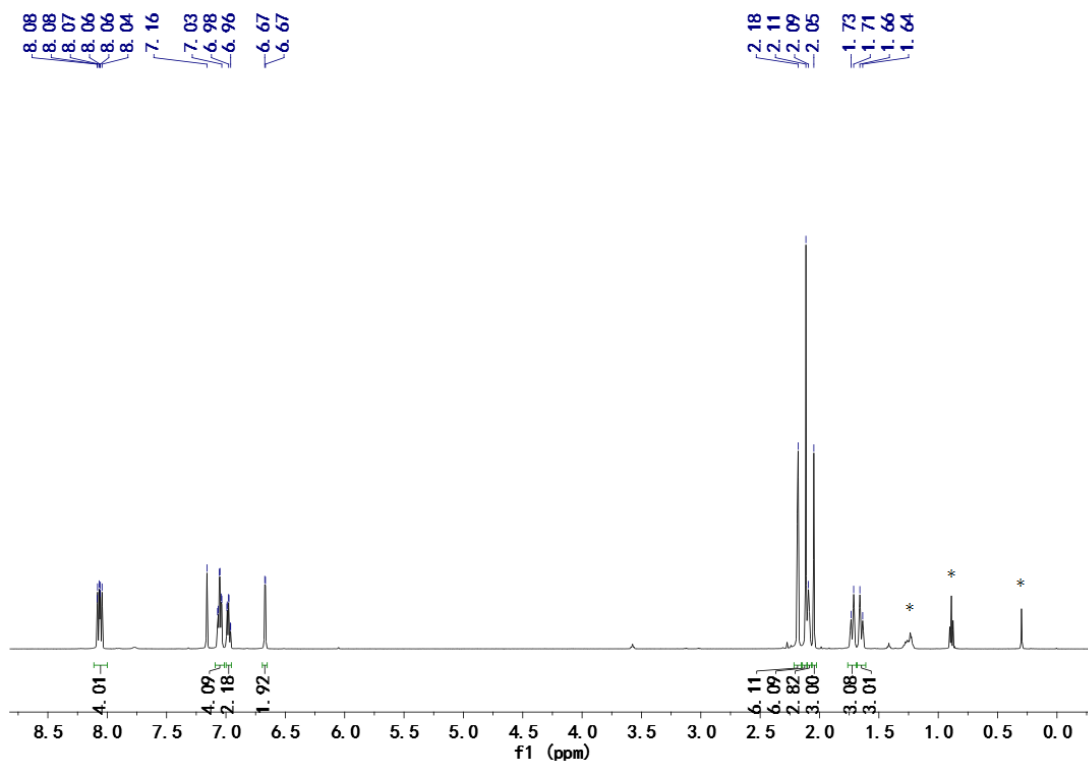

**Figure S34.**  $^1\text{H}$  NMR spectrum of **12** in  $\text{C}_6\text{D}_6$  at  $25\text{ }^\circ\text{C}$ . (\* denotes small amount of hexane and silicon-grease)

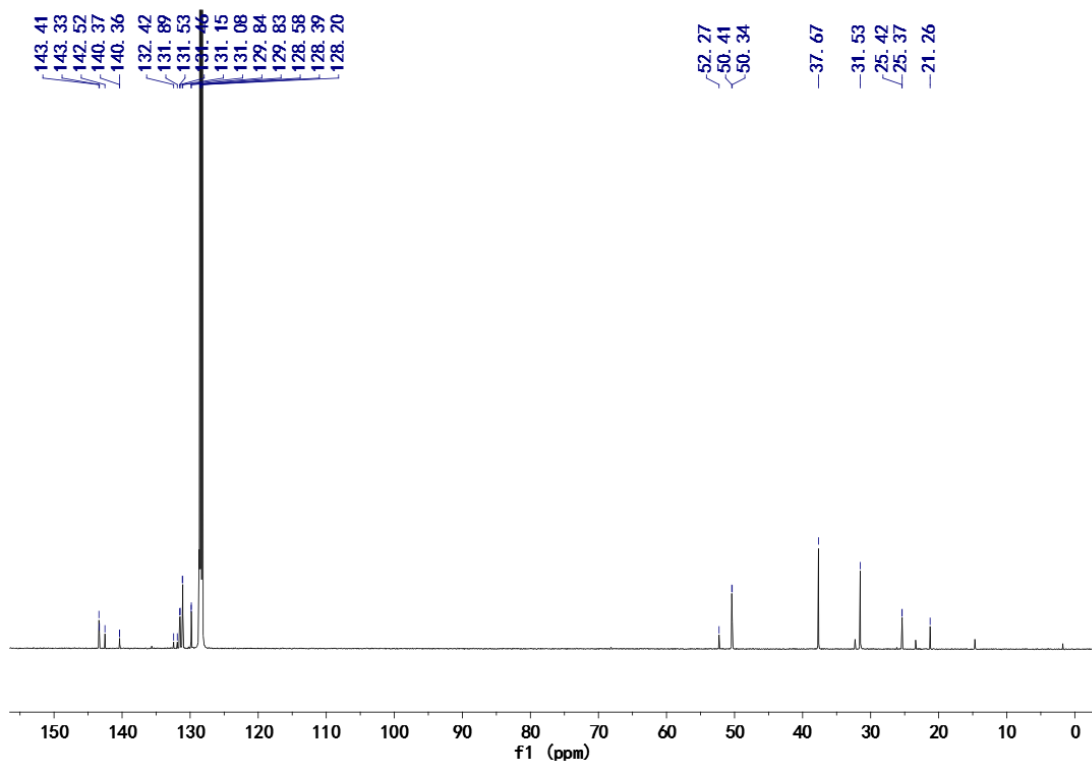

Figure S35.  $^{13}\text{C}\{^1\text{H}\}$  NMR spectrum of **12** in  $\text{C}_6\text{D}_6$  at 25 °C.

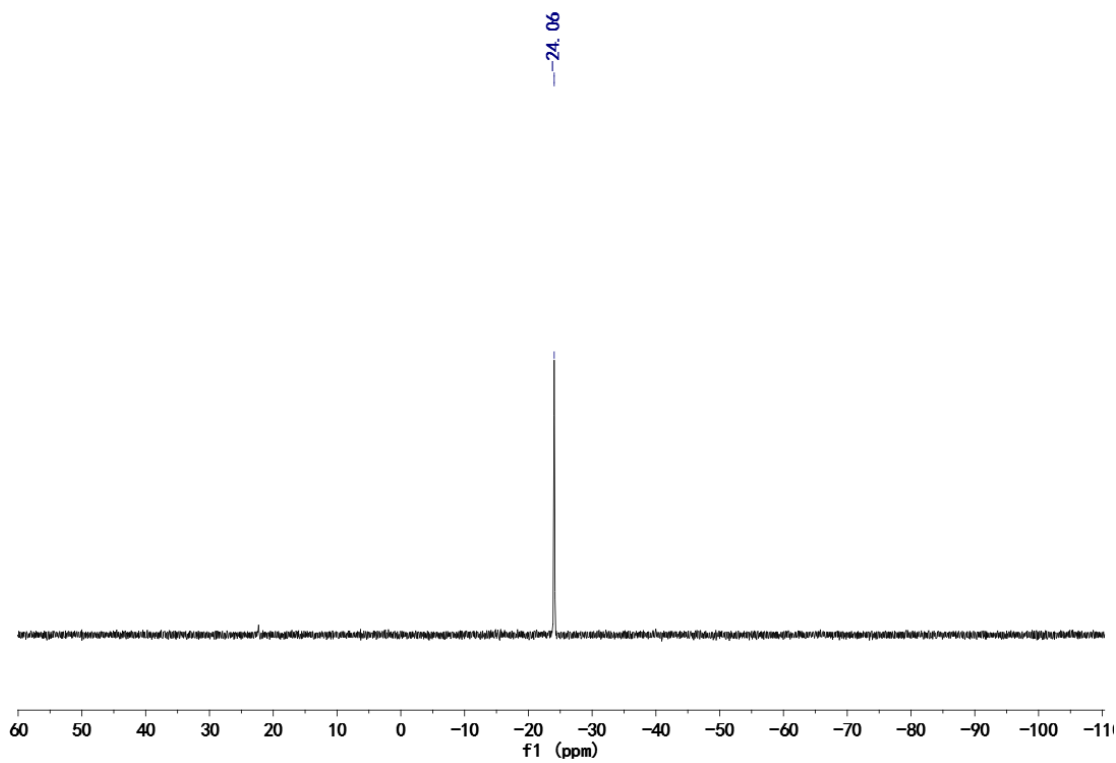

Figure S36.  $^{31}\text{P}\{^1\text{H}\}$  NMR spectrum of **12** in  $\text{C}_6\text{D}_6$  at 25 °C.

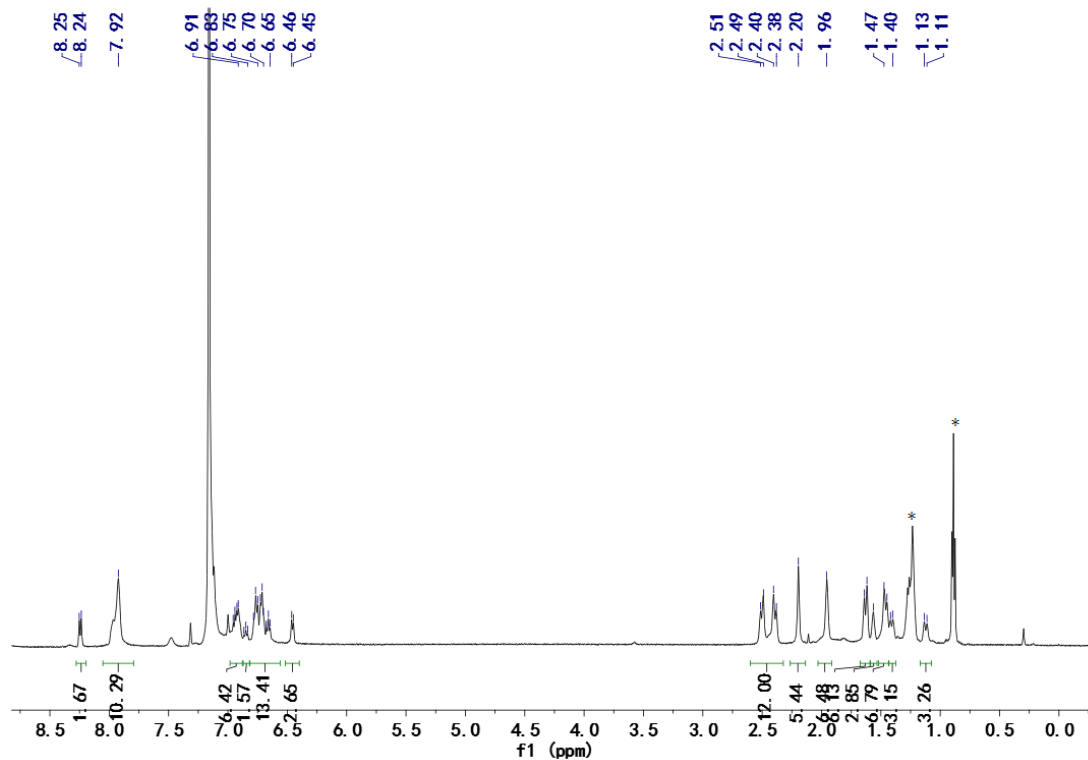

Figure S37.  $^1\text{H}$  NMR spectrum of **13** in  $\text{C}_6\text{D}_6$  at  $25^\circ\text{C}$ . (\* denotes small amount of hexane)

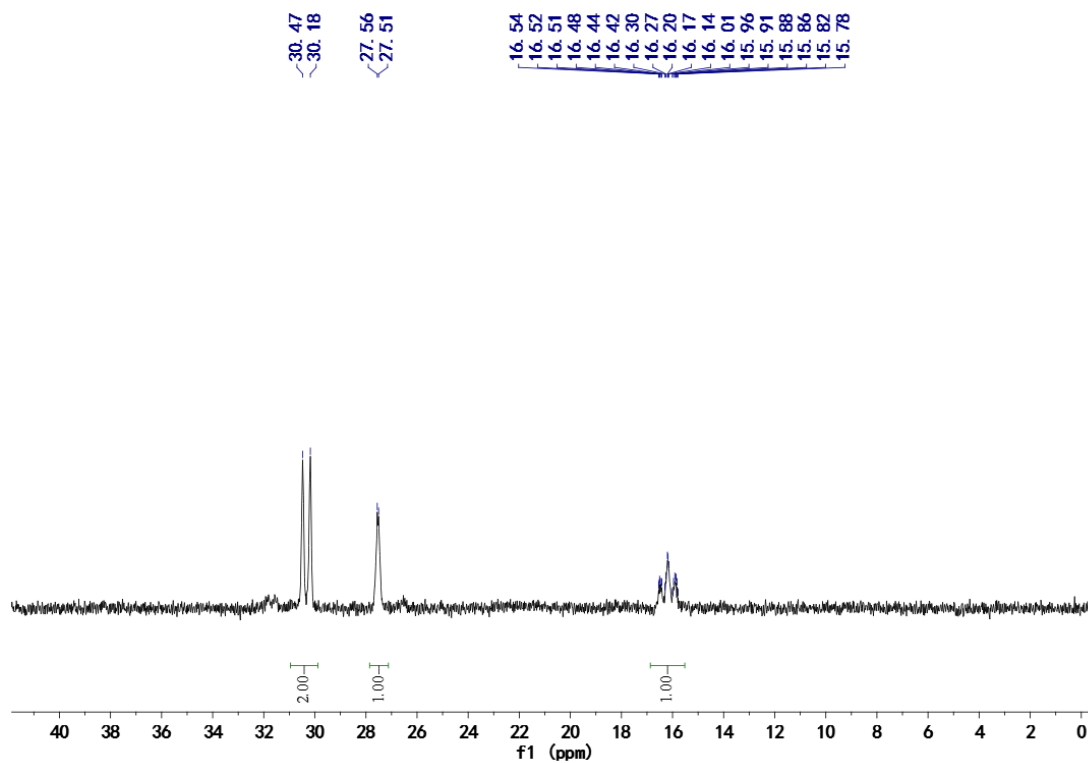

Figure S38.  $^{31}\text{P}\{^1\text{H}\}$  NMR spectrum of **13** in  $\text{C}_6\text{D}_6$  at  $25^\circ\text{C}$ .

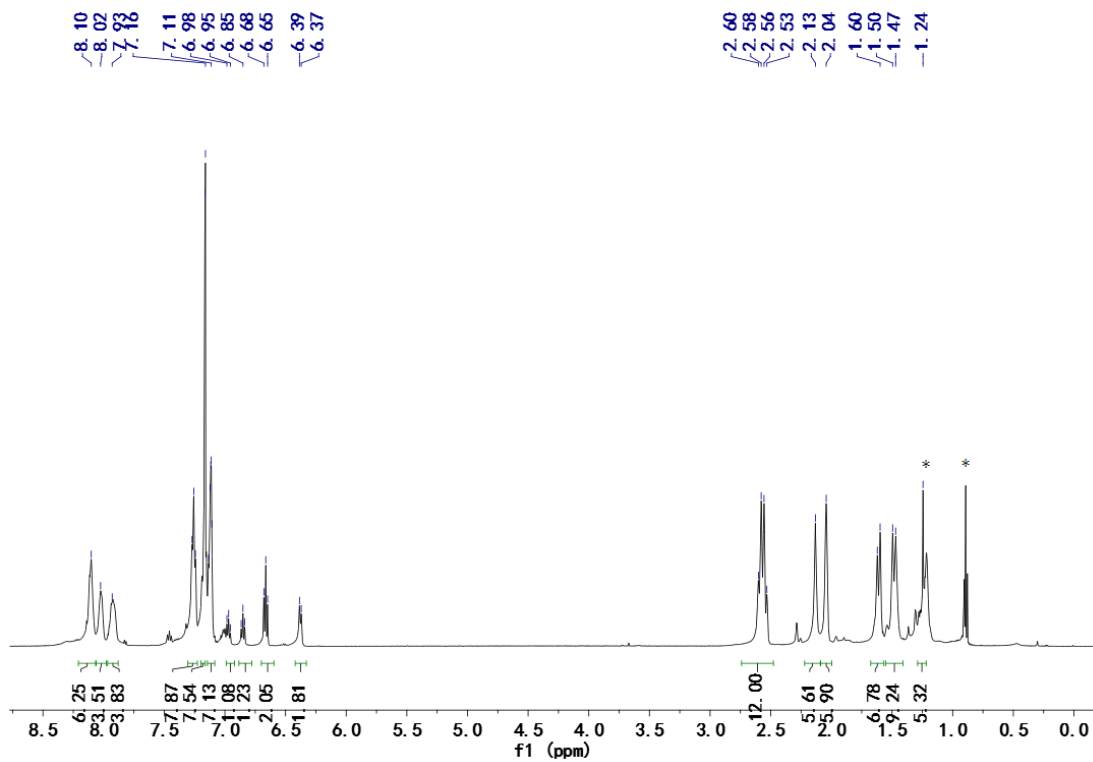

**Figure S39.**  $^1\text{H}$  NMR spectrum of **14** in  $\text{C}_6\text{D}_6$  at  $25\text{ }^\circ\text{C}$ . (\* denotes small amount of hexane)

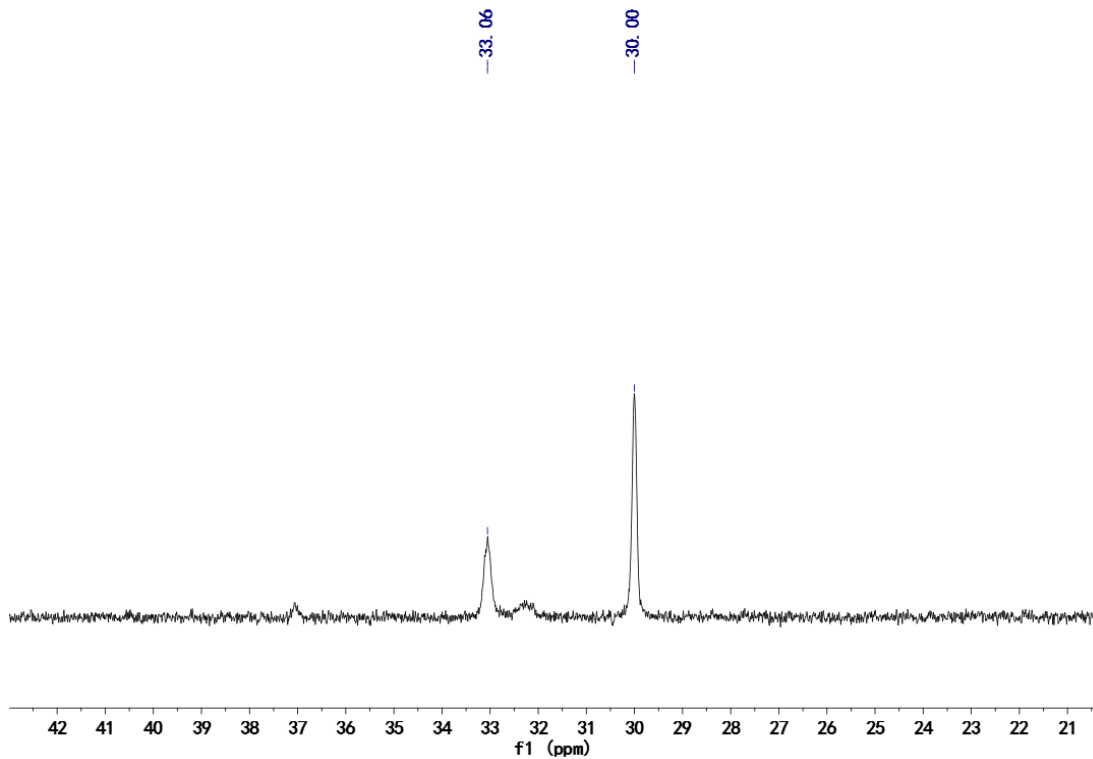

**Figure S40.**  $^{31}\text{P}\{^1\text{H}\}$  NMR spectrum of **14** in  $\text{C}_6\text{D}_6$  at  $25\text{ }^\circ\text{C}$ .

## 2. X-ray Crystallography

**X-ray Crystallography.** Data were collected on a Bruker CCD area-detector diffractometer with Mo K  $\alpha$  radiation (graphite monochromator,  $\lambda = 0.71073 \text{ \AA}$ ) using  $\omega$  scans. The SMART program package was used for the data collection and unit cell determination; processing of the raw frame data was performed using SAINT; absorption corrections were applied with SADABS. The structures were solved by direct methods and refined against  $F^2$  using all reflections with the SHELXL-97 software as implemented in the program WinGX. Non-hydrogen atoms were refined anisotropically, and hydrogen atoms were placed in calculated positions. Crystal parameters and refinement results are given in Table S1-S3.

**Table S1.** Crystallographic and Refinement Data <sup>a,b</sup> for **1, 3, 4**

|                                             | <b>1</b>                                                         | <b>3</b>                                                         | <b>4</b>                                                         |
|---------------------------------------------|------------------------------------------------------------------|------------------------------------------------------------------|------------------------------------------------------------------|
| formula                                     | C <sub>66</sub> H <sub>75</sub> N <sub>3</sub> P <sub>3</sub> Sc | C <sub>66</sub> H <sub>75</sub> N <sub>3</sub> P <sub>3</sub> Yb | C <sub>66</sub> H <sub>75</sub> N <sub>3</sub> P <sub>3</sub> Lu |
| Fw, g·mol <sup>-1</sup>                     | 1048.16                                                          | 1176.24                                                          | 1178.17                                                          |
| cryst size, mm                              | 0.212 x 0.211 x 0.2                                              | 0.22 x 0.21 x 0.18                                               | 0.22 x 0.2 x 0.18                                                |
| cryst. syst.                                | Monoclinic                                                       | Monoclinic                                                       | Monoclinic                                                       |
| space group                                 | C 1 c 1                                                          | C 1 c 1                                                          | C 1 c 1                                                          |
| T, K                                        | 273.15                                                           | 273.15                                                           | 273.15                                                           |
| a, Å                                        | 23.373(5)                                                        | 23.614(5)                                                        | 23.6419(17)                                                      |
| b, Å                                        | 13.307(3)                                                        | 13.421(3)                                                        | 13.4745(10)                                                      |
| c, Å                                        | 20.286(4)                                                        | 20.275(4)                                                        | 20.3693(19)                                                      |
| $\alpha$ , °                                | 90                                                               | 90                                                               | 90                                                               |
| $\beta$ , °                                 | 96.19(3)                                                         | 96.22(3)                                                         | 96.253(4)                                                        |
| $\gamma$ , °                                | 90                                                               | 90                                                               | 90                                                               |
| V, Å <sup>3</sup>                           | 6273(2)                                                          | 6388(2)                                                          | 6450.3(9)                                                        |
| Z                                           | 4                                                                | 4                                                                | 4                                                                |
| D <sub>calcd</sub> , Kg·m <sup>-3</sup>     | 1.110                                                            | 1.223                                                            | 1.213                                                            |
| F(000)                                      | 2232                                                             | 2428                                                             | 2432                                                             |
| $\mu$ , mm <sup>-1</sup>                    | 0.233                                                            | 1.578                                                            | 1.643                                                            |
| $\theta$ range /°                           | 3.043 - 27.678                                                   | 3.014 - 27.689                                                   | 3.008 - 27.609                                                   |
| reflns collected                            | 129791                                                           | 138163                                                           | 137498                                                           |
| indep reflns ( $R_{int}$ )                  | 14395 (0.0453)                                                   | 14758 (0.0388)                                                   | 14902 (0.1135)                                                   |
| reflns obsd [ $I > 2\sigma(I)$ ]            | 13567                                                            | 14553                                                            | 14404                                                            |
| data/restrnts/params                        | 14395 / 184 / 647                                                | 14758 / 1641 / 587                                               | 14902 / 1636 / 586                                               |
| R1, wR2 ( $I > 2\sigma(I)$ )                | 0.0639, 0.1681                                                   | 0.0421, 0.1044                                                   | 0.0647, 0.1458                                                   |
| R1, wR2 (all data)                          | 0.0679, 0.1728                                                   | 0.0427, 0.1047                                                   | 0.0670, 0.1476                                                   |
| GOF on F2                                   | 1.039                                                            | 1.114                                                            | 1.104                                                            |
| $\Delta\rho_{max, min}$ , e·Å <sup>-3</sup> | 0.863, -0.612                                                    | 1.491, -4.036                                                    | 2.572, -3.271                                                    |

$$^a R1 = \frac{\sum |F_o| - |F_c|}{\sum |F_o|}, \quad ^b wR2 = \left\{ \frac{\sum w(F_o^2 - F_c^2)^2}{\sum w(F_o^2)} \right\}^{1/2}.$$

**Table S2.** Crystallographic and Refinement Data <sup>a,b</sup> for **5, 6, 7, 8**

|                                                                             | <b>5</b>                                                           | <b>6</b>                                                          | <b>7</b>                                                           | <b>8</b>                                                           |
|-----------------------------------------------------------------------------|--------------------------------------------------------------------|-------------------------------------------------------------------|--------------------------------------------------------------------|--------------------------------------------------------------------|
| formula                                                                     | C <sub>84</sub> H <sub>90</sub> N <sub>3</sub> P <sub>4</sub> PdSc | C <sub>84</sub> H <sub>90</sub> N <sub>3</sub> P <sub>4</sub> PdY | C <sub>84</sub> H <sub>90</sub> N <sub>3</sub> P <sub>4</sub> PdYb | C <sub>84</sub> H <sub>90</sub> N <sub>3</sub> P <sub>4</sub> PdLu |
| Fw, g·mol <sup>-1</sup>                                                     | 1416.83                                                            | 1460.78                                                           | 1544.90                                                            | 1546.83                                                            |
| cryst size, mm                                                              | 0.22 x 0.21 x 0.2                                                  | 0.23 x 0.21 x 0.2                                                 | 0.22 x 0.21 x 0.2                                                  | 0.22 x 0.21 x 0.2                                                  |
| cryst. syst.                                                                | Orthorhombic                                                       | Orthorhombic                                                      | Orthorhombic                                                       | Orthorhombic                                                       |
| space group                                                                 | Pca2 <sub>1</sub>                                                  | Pca2 <sub>1</sub>                                                 | Pca2 <sub>1</sub>                                                  | Pca2 <sub>1</sub>                                                  |
| T, K                                                                        | 273.15                                                             | 273.15                                                            | 273.15                                                             | 273.15                                                             |
| <i>a</i> , Å                                                                | 19.6769(10)                                                        | 19.7283(8)                                                        | 19.7393(19)                                                        | 19.7190(13)                                                        |
| <i>b</i> , Å                                                                | 16.1787(8)                                                         | 16.2808(7)                                                        | 16.2623(16)                                                        | 16.2376(10)                                                        |
| <i>c</i> , Å                                                                | 22.2319(11)                                                        | 22.2544(10)                                                       | 22.283(2)                                                          | 22.2512(14)                                                        |
| <i>α</i> , °                                                                | 90                                                                 | 90                                                                | 90                                                                 | 90                                                                 |
| <i>β</i> , °                                                                | 90                                                                 | 90                                                                | 90                                                                 | 90                                                                 |
| <i>γ</i> , °                                                                | 90                                                                 | 90                                                                | 90                                                                 | 90                                                                 |
| <i>V</i> , Å <sup>3</sup>                                                   | 7077.5(6)                                                          | 7147.9(5)                                                         | 7153.1(12)                                                         | 7124.6(8)                                                          |
| <i>Z</i>                                                                    | 4                                                                  | 4                                                                 | 4                                                                  | 4                                                                  |
| <i>D</i> <sub>calcd.</sub> , Kg·m <sup>-3</sup>                             | 1.330                                                              | 1.357                                                             | 1.435                                                              | 1.442                                                              |
| <i>F</i> (000)                                                              | 2968                                                               | 3040                                                              | 3164                                                               | 3168                                                               |
| <i>μ</i> , mm <sup>-1</sup>                                                 | 0.488                                                              | 1.196                                                             | 1.688                                                              | 1.767                                                              |
| <i>θ</i> range /°                                                           | 2.873 - 27.580                                                     | 2.857 - 27.593                                                    | 1.622 - 27.487                                                     | 2.864 - 27.655                                                     |
| refns collected                                                             | 233897                                                             | 391189                                                            | 60753                                                              | 283355                                                             |
| indep refns ( <i>R</i> <sub>int</sub> )                                     | 15923 (0.0877)                                                     | 16472 (0.1188)                                                    | 16189 (0.0447)                                                     | 16470 (0.0933)                                                     |
| reflns obsd [ <i>I</i> > 2σ( <i>I</i> )]                                    | 13698                                                              | 14211                                                             | 13244                                                              | 14256                                                              |
| data/restrnts/params                                                        | 15923/2071/839                                                     | 16472/2047/838                                                    | 16189/2035/826                                                     | 16470/2061/731                                                     |
| <i>R</i> <sub>1</sub> , <i>wR</i> <sub>2</sub> ( <i>I</i> > 2σ( <i>I</i> )) | 0.0879, 0.1556                                                     | 0.0353, 0.0770                                                    | 0.0331, 0.0693                                                     | 0.0625, 0.1228                                                     |
| <i>R</i> <sub>1</sub> , <i>wR</i> <sub>2</sub> (all data)                   | 0.1041, 0.1645                                                     | 0.0474, 0.0823                                                    | 0.0491, 0.0751                                                     | 0.0789, 0.1351                                                     |
| GOF on F <sup>2</sup>                                                       | 1.166                                                              | 1.042                                                             | 1.020                                                              | 1.052                                                              |
| Δρ <sub>max, min.</sub> , e·Å <sup>-3</sup>                                 | 1.254, -1.424                                                      | 0.504, -0.588                                                     | 0.938, -0.422                                                      | 3.760, -1.605                                                      |

$$^a R1 = \sum |F_o| - |F_c| / \sum |F_o|, \quad ^b wR2 = \{ \sum w(F_o^2 - F_c^2)^2 / \sum w(F_o^2)^2 \}^{1/2}.$$

**Table S3.** Crystallographic and Refinement Data <sup>a,b</sup> for **9, 11, 12, 13, 14**

|                                             | <b>9</b>                                                         | <b>11</b>                          | <b>12</b>                          | <b>13</b>                                                           | <b>14</b>                                                           |
|---------------------------------------------|------------------------------------------------------------------|------------------------------------|------------------------------------|---------------------------------------------------------------------|---------------------------------------------------------------------|
| formula                                     | C <sub>66</sub> H <sub>78</sub> N <sub>3</sub> P <sub>3</sub> Pd | C <sub>28</sub> H <sub>30</sub> NP | C <sub>31</sub> H <sub>36</sub> NP | C <sub>98</sub> H <sub>100</sub> N <sub>3</sub> OP <sub>4</sub> PdY | C <sub>80</sub> H <sub>85</sub> N <sub>3</sub> OP <sub>3</sub> PdSc |
| Fw, g·mol <sup>-1</sup>                     | 1112.62                                                          | 411.50                             | 453.58                             | 1654.99                                                             | 1348.78                                                             |
| cryst size, mm                              | 0.20 x 0.20 x 0.20                                               | 0.23 x 0.22 x 0.21                 | 0.23 x 0.22 x 0.21                 | 0.23 x 0.22 x 0.21                                                  | 0.23 x 0.22 x 0.21                                                  |
| cryst. syst.                                | triclinic                                                        | monoclinic                         | orthorhombic                       | triclinic                                                           | triclinic                                                           |
| space group                                 | P -1                                                             | P 1 21/c 1                         | P b c a                            | P -1                                                                | P -1                                                                |
| T, K                                        | 273.15                                                           | 273.15                             | 273.15                             | 273.15                                                              | 273.15                                                              |
| a, Å                                        | 11.3117(5)                                                       | 12.007(2)                          | 22.862(5)                          | 15.7099(7)                                                          | 13.7460(7)                                                          |
| b, Å                                        | 13.1850(6)                                                       | 9.309(2)                           | 9.491(2)                           | 16.2124(8)                                                          | 14.8611(8)                                                          |
| c, Å                                        | 23.7630(12)                                                      | 20.761(4)                          | 26.992(5)                          | 20.5395(11)                                                         | 20.7806(12)                                                         |
| α, °                                        | 105.848(2)                                                       | 90                                 | 90                                 | 90.746(2)                                                           | 101.234(2)                                                          |
| β, °                                        | 95.818(2)                                                        | 102.63(3)                          | 90                                 | 97.105(2)                                                           | 95.789(2)                                                           |
| γ, °                                        | 104.347(2)                                                       | 90                                 | 90                                 | 92.274(2)                                                           | 105.159(2)                                                          |
| V, Å <sup>3</sup>                           | 3248.3(3)                                                        | 2264.4(8)                          | 5857(2)                            | 5186.2(4)                                                           | 3966.8(4)                                                           |
| Z                                           | 2                                                                | 4                                  | 8                                  | 2                                                                   | 2                                                                   |
| D <sub>calcd.</sub> , Kg·m <sup>-3</sup>    | 1.138                                                            | 1.207                              | 1.029                              | 1.060                                                               | 1.129                                                               |
| F(000)                                      | 1172                                                             | 880                                | 1952                               | 1724                                                                | 1412                                                                |
| μ, mm <sup>-1</sup>                         | 0.398                                                            | 0.136                              | 0.110                              | 0.832                                                               | 0.414                                                               |
| θ range /°                                  | 2.824 - 27.555                                                   | 2.917- 27.373                      | 3.019 - 27.555                     | 2.914 - 27.472                                                      | 2.861 - 27.445                                                      |
| refns collected                             | 64218                                                            | 56457                              | 228850                             | 117459                                                              | 80922                                                               |
| indep reflns (R <sub>int</sub> )            | 14923 (0.0586)                                                   | 5269 (0.0602)                      | 6738 (0.1674)                      | 23602 (0.0969)                                                      | 18192 (0.0606)                                                      |
| reflns obsd [I > 2σ(I)]                     | 10284                                                            | 3895                               | 4186                               | 14013                                                               | 12411                                                               |
| data/restrnts/params                        | 14923/233/740                                                    | 5269/0/271                         | 6738/0/301                         | 23602/2514/973                                                      | 18192/2088/802                                                      |
| R1, wR2 (I > 2σ(I))                         | 0.0583, 0.1325                                                   | 0.0437, 0.1169                     | 0.0941, 0.1924                     | 0.0652, 0.1768                                                      | 0.0556, 0.1380                                                      |
| R1, wR2 (all data)                          | 0.0951, 0.1539                                                   | 0.0654, 0.1342                     | 0.1496, 0.2233                     | 0.1203, 0.2089                                                      | 0.0893, 0.1594                                                      |
| GOF on F2                                   | 1.013                                                            | 1.010                              | 1.028                              | 1.040                                                               | 1.048                                                               |
| Δρ <sub>max, min.</sub> , e·Å <sup>-3</sup> | 0.887, -1.237                                                    | 0.160, -0.300                      | 0.654, -0.354                      | 1.136, -0.926                                                       | 0.906, -0.844                                                       |

$$^a R1 = \frac{\sum |F_o| - |F_c|}{\sum |F_o|}, \quad ^b wR2 = \left\{ \frac{\sum w(F_o^2 - F_c^2)^2}{\sum w(F_o^2)} \right\}^{1/2}.$$



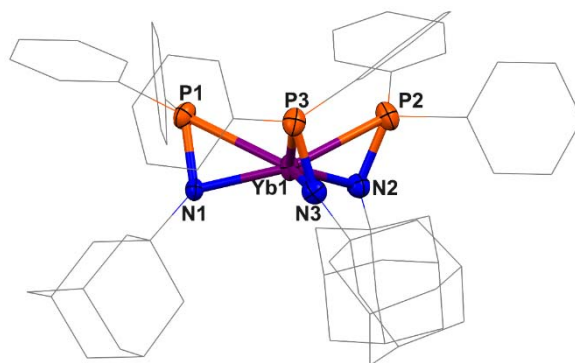

**Figure S41.** Molecular structure of complex 3. Co-crystallized solvent molecules and hydrogen atoms were removed for clarity.

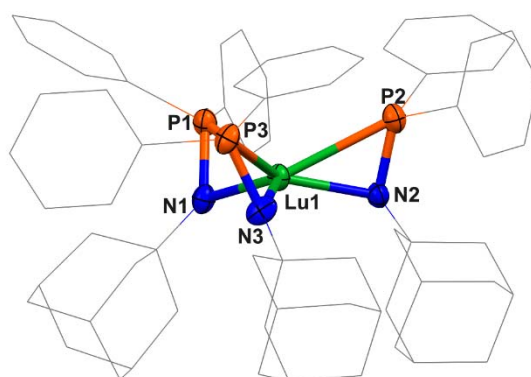

**Figure S42.** Molecular structure of complex 4. Co-crystallized solvent molecules and hydrogen atoms were removed for clarity.

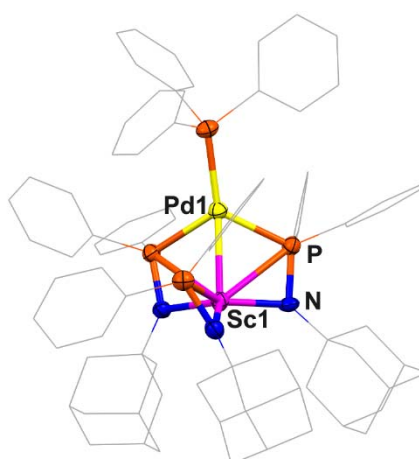

**Figure S43.** Molecular structure of complex 5. Co-crystallized solvent molecules and hydrogen atoms were removed for clarity.

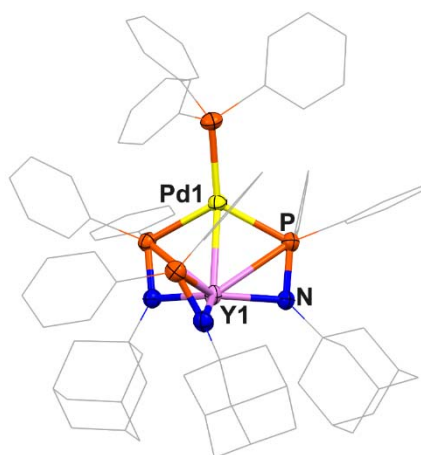

**Figure S44.** Molecular structure of complex **6**. Co-crystallized solvent molecules and hydrogen atoms were removed for clarity.

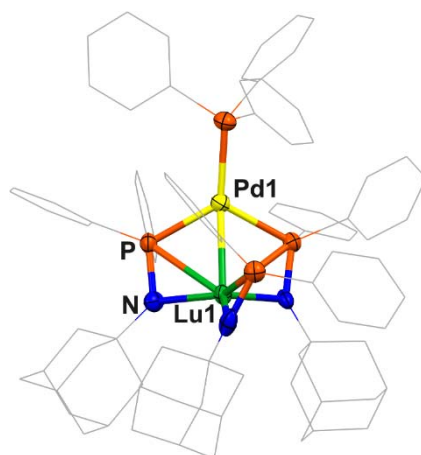

**Figure S45.** Molecular structure of complex **8**. Co-crystallized solvent molecules and hydrogen atoms were removed for clarity.

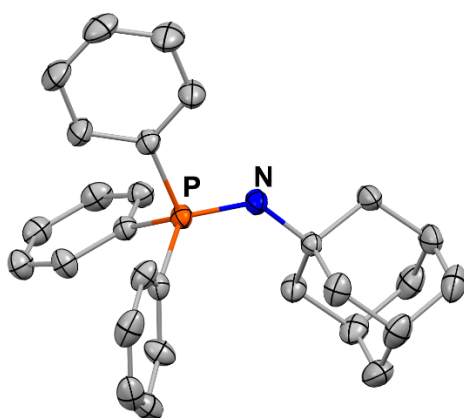

**Figure S46.** Molecular structure of complex **11**. Hydrogen atoms were removed for clarity.

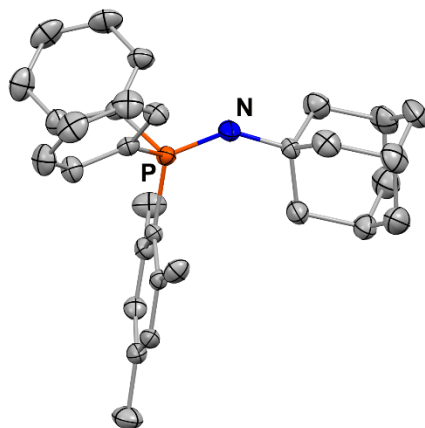

**Figure S47.** Molecular structure of complex **12**. Co-crystallized solvent molecules and hydrogen atoms were removed for clarity.

### 3. Cyclic voltammograms

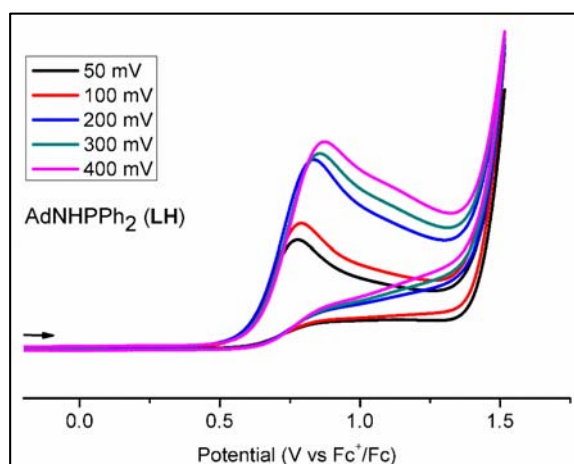

Figure S48. CVs of LH at different scan rates with [Pr<sub>4</sub>N][BAR<sub>4</sub><sup>F</sup>] 0.1 M in 1,2-difluorobenzene.

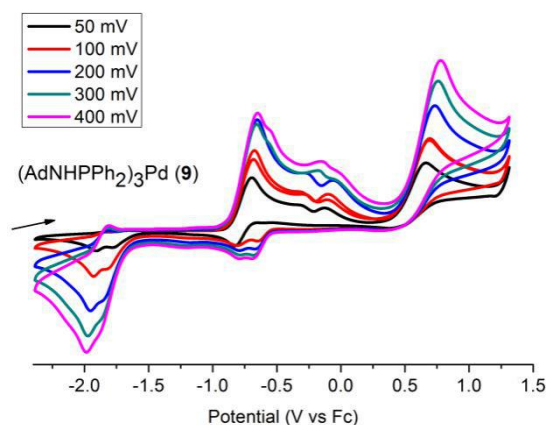

Figure S49. CVs of 9 at different scan rates with [Pr<sub>4</sub>N][BAR<sub>4</sub><sup>F</sup>] 0.1 M in 1,2-difluorobenzene.

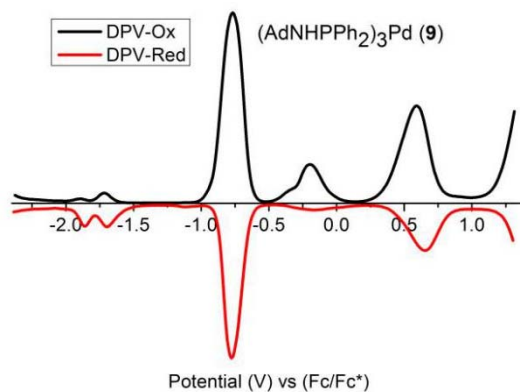

Figure S50. Differential pulse voltammogram of 9 in 1,2-difluorobenzene.

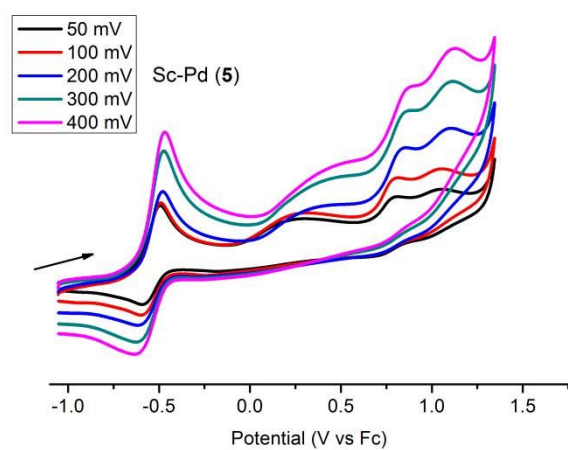

**Figure S51.** CVs of **5** at different scan rates with  $[\text{Pr}_4\text{N}][\text{BARF}_4]$  0.1 M in 1,2-difluorobenzene.

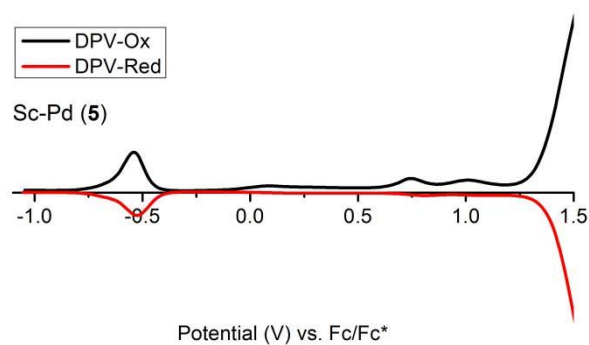

**Figure S52.** Differential pulse voltammogram of **5** in 1,2-difluorobenzene.

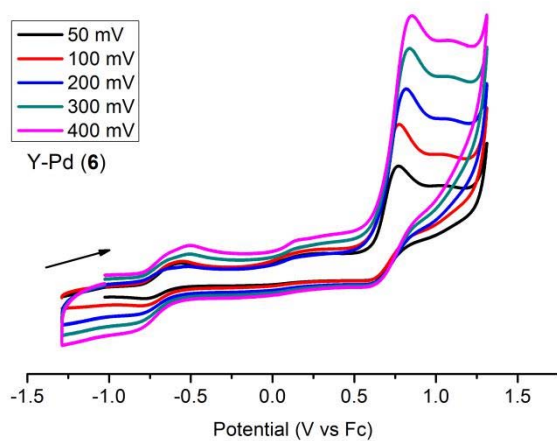

**Figure S53.** CVs of **6** at different scan rates with  $[\text{Pr}_4\text{N}][\text{BARF}_4]$  0.1 M in 1,2-difluorobenzene.

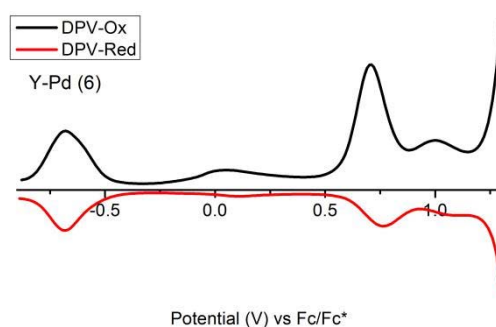

**Figure S54.** Differential pulse voltammogram of **6** in 1,2-difluorobenzene.

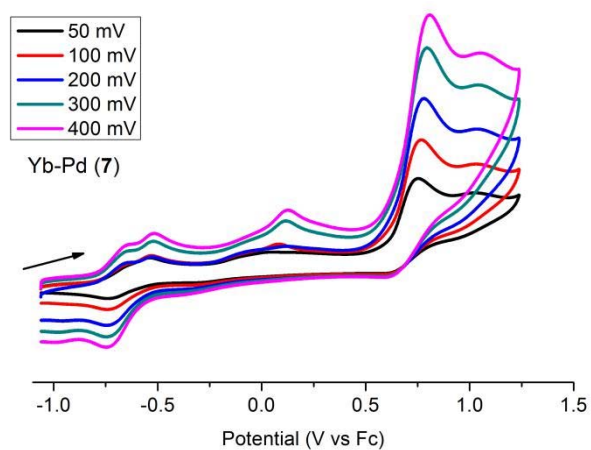

**Figure S55.** CVs of **7** at different scan rates with  $[\text{Pr}_4\text{N}][\text{BARF}_4]$  0.1 M in 1,2-difluorobenzene.

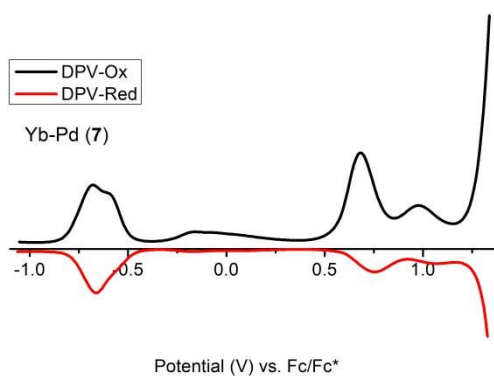

**Figure S56.** Differential pulse voltammogram of **7** in 1,2-difluorobenzene.

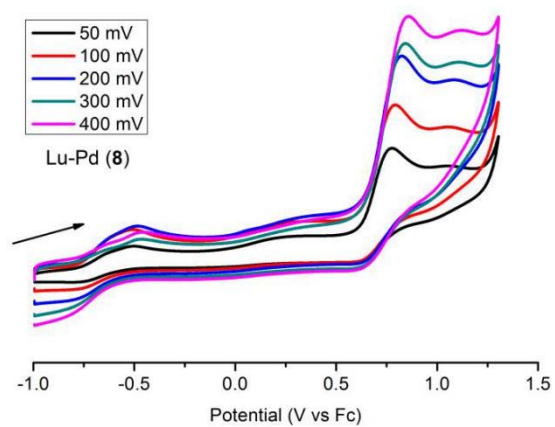

**Figure S57.** CVs of **8** at different scan rates with  $[\text{Pr}_4\text{N}][\text{BAR}^{\text{F}}_4]$  0.1 M in 1,2-difluorobenzene.

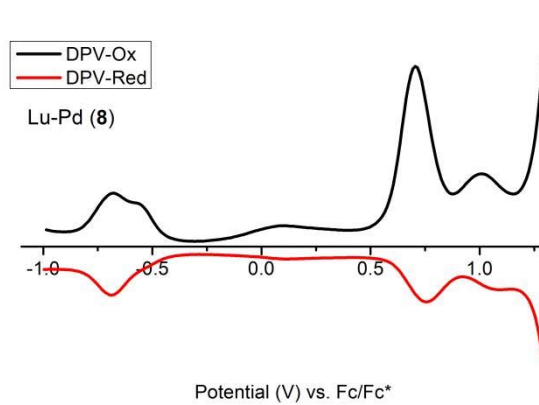

**Figure S58.** Differential pulse voltammogram of **8** in 1,2-difluorobenzene.

## 4. Computational Details

All calculations were performed with the ORCA program package.<sup>[1]</sup> For geometry optimizations, the hybrid B3LYP<sup>[2]</sup> density functional was used without any constraint. The all-electron triple- $\zeta$  quality Def2-TZVP basis<sup>[3]</sup> sets were assigned for metal centers and the directly coordinated atoms (such as N, P in the ligand), Def2-ECP pseudopotentials<sup>[4]</sup> with Def2-TZVP valence basis sets were used for heavier metal element such as Pd (28 core electrons), Y (28 core electrons), Yb (28 core electrons) and Lu (28 core electrons), and Def2-SV(P) bases sets<sup>[3]</sup> were applied for the remaining elements in these compounds. The RI plus chain of spheres (RIJCOSX for B3LYP) approximation<sup>[5]</sup> was used to accelerate the calculations with the Weigend's "universal" Coulomb fitting auxiliary basis set def2/J<sup>[6]</sup> We had included the atom-pairwise dispersion correction with Becke-Johnson damping (D3BJ) to account for the van der Waals interaction.<sup>[7]</sup> The natural bond orbitals (NBO) analysis was done using NBO 6.0 program.<sup>[8]</sup> Similar calculation set up were also applied in our previous researches on dative bonding between transition metals and rare earth elements.<sup>[9]</sup>

**Table S4.** Calculated bond lengths for selected bonds in **5, 6, 7, 8**

|          | Pd-M / Å<br>(M = Sc, Y, Yb, Lu) | Pd-P / Å                       | M-N ; M-P / Å<br>(M = Sc, Y, Yb, Lu)                  |
|----------|---------------------------------|--------------------------------|-------------------------------------------------------|
| <b>5</b> | 2.688                           | 2.326; 2.364<br>2.344 (axial)  | 2.073; 2.123; 2.132(M-N);<br>2.643, 2.789, 2.845(M-P) |
| <b>6</b> | 2.797                           | 2.401; 2.355;<br>2.362 (axial) | 2.230; 2.259; 2.276(M-N);<br>2.819, 2.923, 2.970(M-P) |
| <b>7</b> | 2.781                           | 2.342; 2.385;<br>2.355 (axial) | 2.198; 2.229; 2.243(M-N);<br>2.761, 2.887, 2.939(M-P) |
| <b>8</b> | 2.763                           | 2.342; 2.379;<br>2.349 (axial) | 2.176; 2.221; 2.233(M-N);<br>2.743, 2.878, 2.919(M-P) |

**Table S5.** Calculated atomic charges

|          | Mülliken Charges |                      | Löewdin Charges |                      | Natural Charges |                      |
|----------|------------------|----------------------|-----------------|----------------------|-----------------|----------------------|
|          | Pd               | M<br>(Sc, Y, Yb, Lu) | Pd              | M<br>(Sc, Y, Yb, Lu) | Pd              | M<br>(Sc, Y, Yb, Lu) |
| <b>5</b> | -0.579           | -0.291               | -0.878          | -0.542               | -0.087          | 1.761                |
| <b>6</b> | -0.604           | 0.266                | -0.869          | -0.394               | -0.101          | 1.738                |
| <b>7</b> | -0.481           | 0.359                | -0.900          | -0.092               | -0.091          | 1.613                |
| <b>8</b> | -0.605           | 0.455                | -0.899          | -0.090               | -0.086          | 1.643                |



**Table S6.** Calculated Wieberg and Mayer bond orders for selected bonds in **5, 6, 7, 8**

|          | Wieberg Bond Orders | Mayer Bond Orders |
|----------|---------------------|-------------------|
| <b>5</b> | 0.659               | 0.414             |
| <b>6</b> | 0.715               | 0.334             |
| <b>7</b> | 0.560               | 0.368             |
| <b>8</b> | 0.643               | 0.359             |

**Table S7.** Calculated natural electron configurations for metal centers in **5, 6, 7, 8**

| Compound | Electron Configuration                                           |
|----------|------------------------------------------------------------------|
| <b>5</b> | Sc [core] 4s( 0.10)3d( 0.88)4p( 0.01)4d( 0.24)5d( 0.01)          |
|          | Pd [core] 5s( 0.43)4d( 9.61)5p( 0.02)5d( 0.01)6p( 0.01)          |
| <b>6</b> | Y [core] 5s( 0.10)4d( 1.02)5p( 0.01)5d( 0.12)                    |
|          | Pd [core] 5s( 0.44)4d( 9.62)5p( 0.02)5d( 0.01)6p( 0.01)          |
| <b>7</b> | Yb [core] 6s( 0.12)4f(13.04)5d( 1.15)6p( 0.01)6d( 0.05)7p( 0.01) |
|          | Pd [core] 5s( 0.45)4d( 9.60)5p( 0.02)5d( 0.01)                   |
| <b>8</b> | Lu [core] 6s( 0.13)5d( 1.13)6p( 0.01)6d( 0.08)7p( 0.01)          |
|          | Pd [core] 5s( 0.43)4d( 9.61)5p( 0.02)5d( 0.01)6p( 0.01)          |

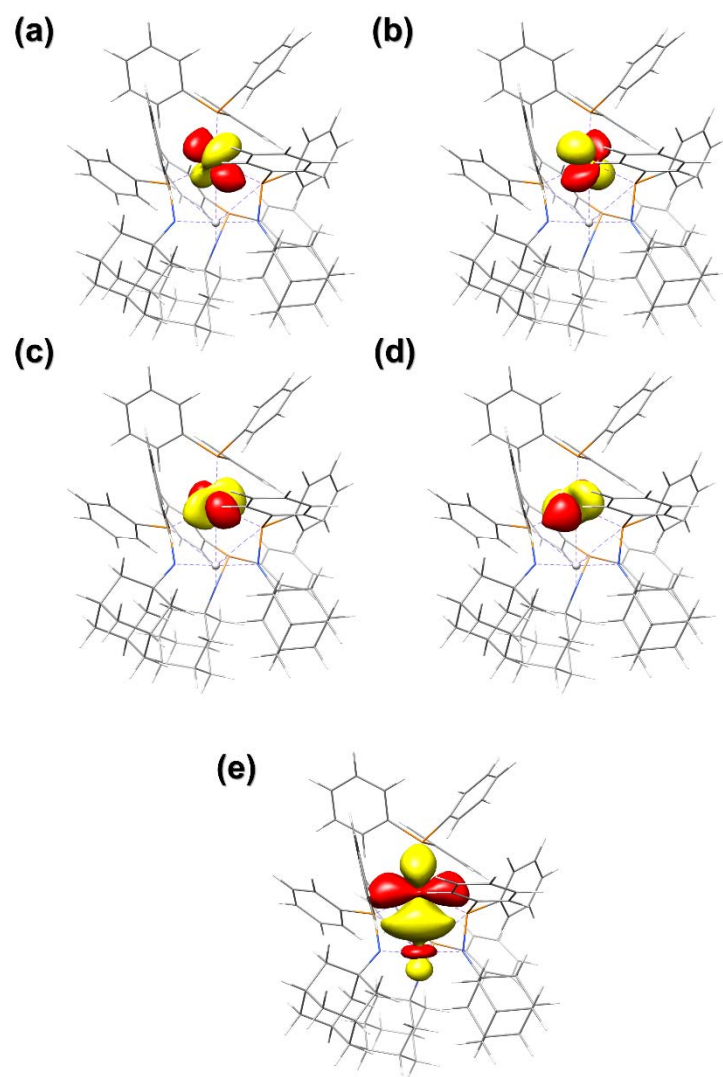

**Figure S59.** Localized orbitals representing the four doubly occupied d orbitals (a-d, isovalue = 0.05) and the dative bond (e, isovalue = 0.02) of **5**.

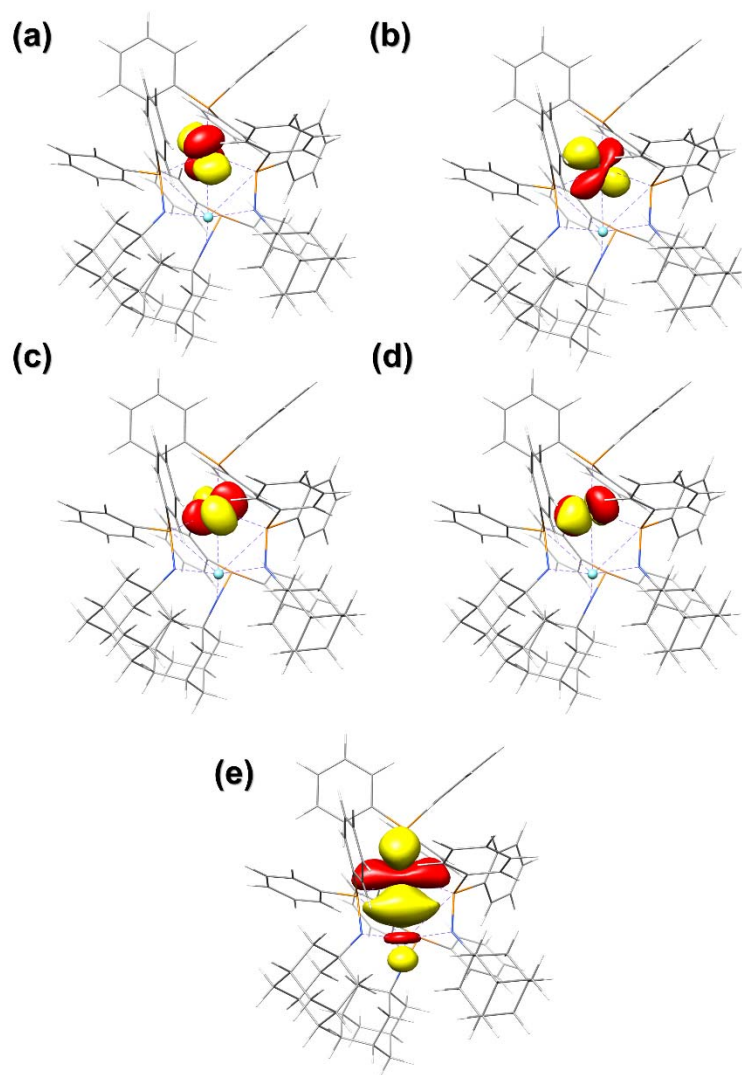

**Figure S60.** Localized orbitals representing the four doubly occupied d orbitals (a-d, isovalue = 0.05) and the dative bond (e, isovalue = 0.02) of **6**.

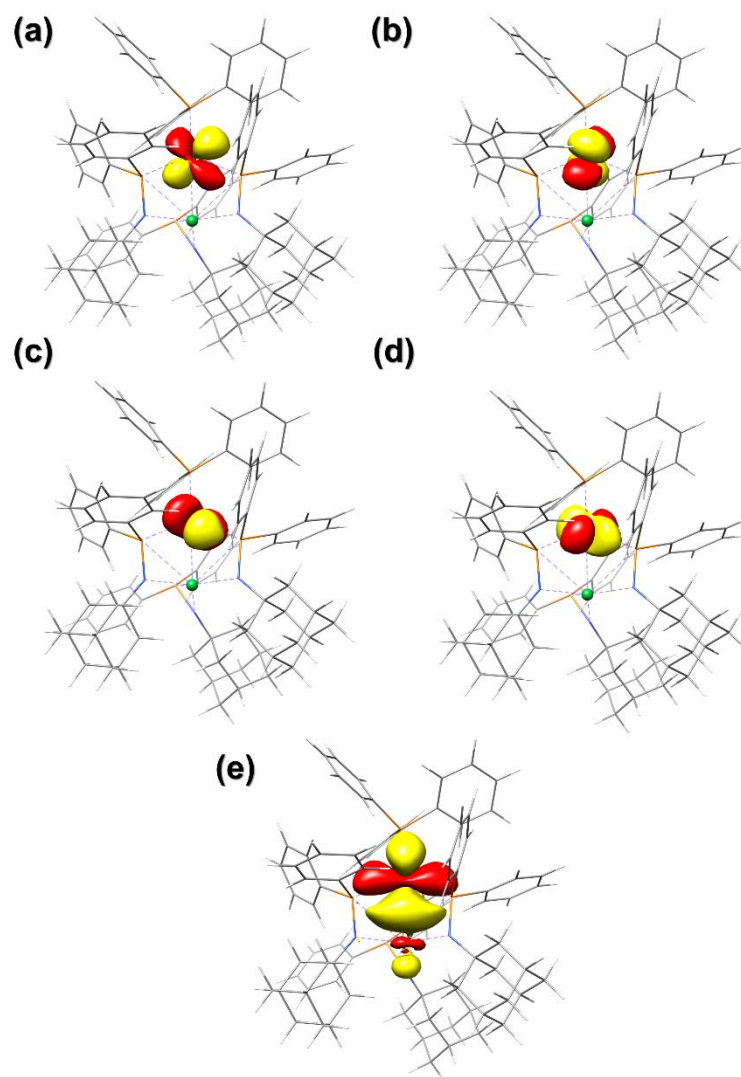

**Figure S61.** Localized orbitals representing the four doubly occupied d orbitals (a-d, isovalue = 0.05) and the dative bond (e, isovalue = 0.02) of 7.

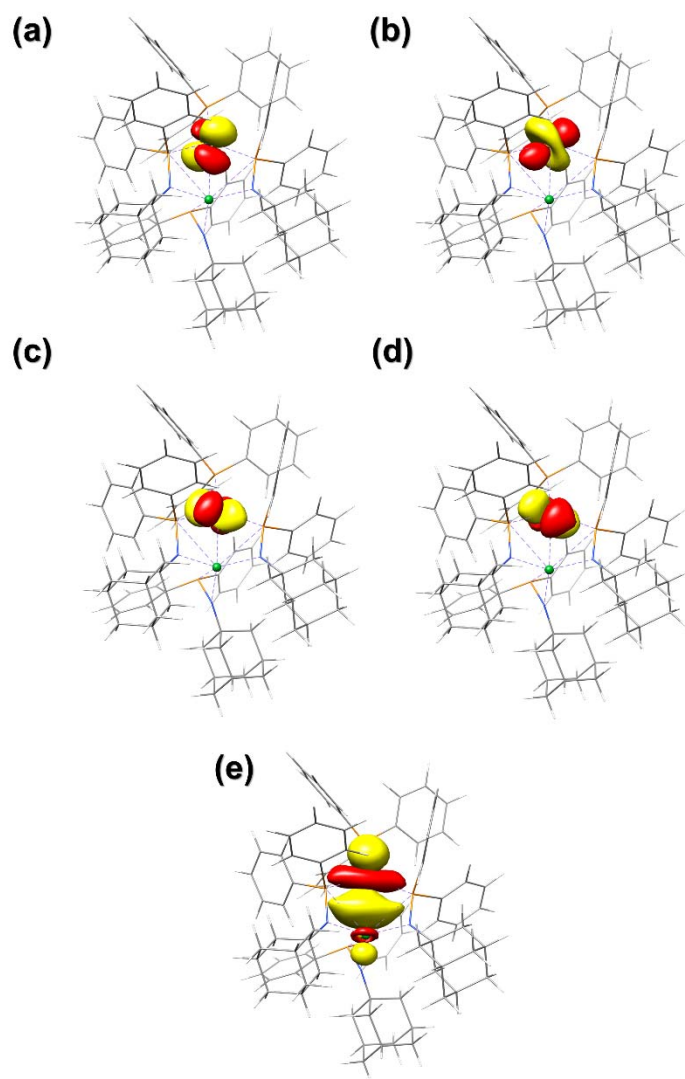

**Figure S62.** Localized orbitals representing the four doubly occupied d orbitals (a-d, isovalue = 0.05) and the dative bond (e, isovalue = 0.02) of **8**.

## 5. References

- [1] a) F. Neese, *WIREs. Comput. Mol. Sci.*, 2012, **2**, 73; b) F. Neese, *WIREs. Comput. Mol. Sci.*, 2017, **8**, e1327.
- [2] a) A. D. Becke, *J. Chem. Phys.*, 1993, **98**, 5648; b) C. Lee, W. T. Yang, R. G. Parr, *Phys. Rev. B*, 1988, **37**, 785; c) S. H. Vosko, L. Wilk, M. Nusair, *Can. J. Phys.*, 1980, **58**, 1200; d) P. J. Stephens, F. J. Devlin, C. F. Chabalowski, M. J. Frisch, *J. Phys. Chem.*, 1994, **98**, 11623.
- [3] F. Weigend and R. Ahlrichs, *Phys. Chem. Chem. Phys.*, 2005, **7**, 3297.
- [4] A. Andrae, U. Häußermann, M. Dolg, H. Stoll, H. Preuß, *Theor. Chim. Acta.*, 1990,

---

77, 123.

- [5] F. Neese, F. Wennmohs, A. Hansen, U. Becker, *Chem. Phys.*, 2009, **356**, 98.
- [6] F. Weigend, *Phys. Chem. Chem. Phys.*, 2006, **8**, 1057.
- [7] a) S. Grimme, S. Ehrlich, L. Goerigk, *J. Comput. Chem.*, 2011, **32**, 1456; b) S. Grimme, *J. Comput. Chem.*, 2004, **25**, 1463; c) S. Grimme, *J. Comput. Chem.*, 2006, **27**, 1787; d) S. Grimme, J. Antony, S. Ehrlich, H. Krieg, *J. Chem. Phys.*, 2010, **132**, 154104.
- [8] NBO 6.0. E. D. Glendening, J. K. Badenhoop, A. E. Reed, J. E. Carpenter, J. A. Bohmann, C. M. Morales, C. R. Landis, and F. Weinhold, Theoretical Chemistry Institute, University of Wisconsin, Madison (2013).
- [9] a) J. Du, Z. Huang, Y. Zhang, S. Wang, S. Zhou, H. Fang, P. Cui, *Chem. Eur. J.*, 2019, **25**, 10149; b) P. Cui, C. Xiong, J. Du, S. Xie, H. Wang, S. Zhou, H. Fang, S. Wang, *Dalton Trans.*, 2020, **49**, 124.
